# Supplementary material for: Infrared spectra and structures of protonated amantadine isomers: detection of ammonium and open-cage iminium ions
Source: Royal Society of Chemistry journal article supplement (doi:10.1039/d2cp01947g), 2022-01-01
Supplement: d2cp01947g1.pdf [file d2cp01947g1.pdf]

## **Electronic Supporting Information (ESI)**

### **Infrared Spectra and Structures of Protonated Amantadine Isomers: Detection of Ammonium and Open-Cage Iminium Ions**

Martin Andreas Robert George and Otto Dopfer\*

Institut für Optik und Atomare Physik, Technische Universität Berlin, Hardenbergstr. 36, 10623 Berlin (Germany)

\* Corresponding author, [dopfer@physik.tu-berlin.de](mailto:dopfer@physik.tu-berlin.de)

## Table of Contents

**Table S1.** Computed vibrational frequencies (in  $\text{cm}^{-1}$ , B3LYP-D3/cc-pVTZ) of  $\text{AmaH}^+(\text{I-IV})$  compared to experimental values of  $\text{AmaH}^+\text{Ar}$  (Figure 1 and 2).

**Table S2.** Various energies of the  $\text{AmaH}^+(\text{I-IV})$  isomers (in  $\text{kJ mol}^{-1}$ ) calculated at the B3LYP-D3/cc-pVTZ level.

**Table S3.** Computed vibrational frequencies (in  $\text{cm}^{-1}$ , B3LYP-D3/cc-pVTZ) of Ama compared to calculated vibrational frequencies of  $\text{AmaH}^+(\text{I-IV})$  (Figure S4).

**Table S4.** Computed vibrational frequencies (in  $\text{cm}^{-1}$ , B3LYP-D3/cc-pVTZ) of  $\text{Ama}^+(\text{I-III})$  compared to experimental values of  $\text{Ama}^+\text{Ar}$ .

**Table S5.** Computed vibrational frequencies (in  $\text{cm}^{-1}$ , B3LYP-D3/cc-pVTZ) of  $\text{AmaH}^+(\text{I-IV})\text{-Ar(I)}$  compared to experimental values of  $\text{AmaH}^+\text{Ar}$  (Figure S7-S10).

**Table S6.** Various energies of the  $\text{AmaH}^+(\text{I-IV})\text{-Ar(I-VI)}$  isomers (in  $\text{kJ mol}^{-1}$ ) calculated at the B3LYP-D3/cc-pVTZ level.

**Figure S1.** Mass spectra of the EI ion source for an expansion of Ama seeded in 5-9 bar of  $\text{Ar/H}_2$ . Major fragment ions of Ama ( $m/z$  151) at  $m/z$  135, 108, 94, and 57 are indicated (F).

**Figure S2.** Collision-induced dissociation (CID) spectrum of size-selected  $\text{AmaH}^+\text{Ar}$  clusters to illustrate the loss of Ar as major fragmentation channel.

**Figure S3.** Calculated equilibrium structures (in Å and degrees) and NBO charge distribution (in me) of  $\text{AmaH}^+(\text{I-IV})$ ,  $\text{Ama}^+(\text{I-III})$ , and Ama in the ground electronic state calculated at the B3LYP-D3/cc-pVTZ level.

**Figure S4.** Calculated IR spectrum of Ama compared to calculated IR spectra of  $\text{AmaH}^+(\text{I-IV})$ . Relevant modes are listed in Table S3.

**Figure S5.** HOMO orbitals of  $\text{AmaH}^+(\text{I-IV})$ ,  $\text{Ama}^+(\text{I-III})$ , and Ama evaluated at the B3LYP-D3/cc-pVTZ level.

**Figure S6.** Calculated equilibrium structures (in Å and degrees) and NBO charge distribution (in me) of  $\text{AmaH}^+(\text{I-IV})$  and  $\text{AmaH}^+(\text{I-IV})\text{-Ar(I)}$  in the ground electronic state calculated at the B3LYP-D3/cc-pVTZ level.

**Figure S7-S10.** IRPD spectra of  $\text{AmaH}^+\text{Ar}$  in the XH stretch and fingerprint ranges compared to linear IR absorption spectra of  $\text{AmaH}^+(\text{I-IV})\text{-Ar}$  and  $\text{AmaH}^+(\text{I-IV})$  calculated at the B3LYP-D3/cc-pVTZ level. Relative energies ( $E_0$ ) are given in  $\text{kJ mol}^{-1}$ . (S7)  $\text{AmaH}^+(\text{I})\text{-Ar(I-V)}$ ; (S8)  $\text{AmaH}^+(\text{II})\text{-Ar(I-VI)}$ ; (S9)  $\text{AmaH}^+(\text{III})\text{-Ar(I-VI)}$ ; (S10)  $\text{AmaH}^+(\text{IV})\text{-Ar(I-VI)}$ .

**Cartesian coordinates (in Å) and energies (in hartree) of all structures**

**Table S1.** Computed vibrational frequencies (in  $\text{cm}^{-1}$ , B3LYP-D3/cc-pVTZ) of  $\text{AmaH}^+(\text{I-IV})$  compared to experimental values of  $\text{AmaH}^+\text{Ar}$  (Figure 1 and 2).<sup>a</sup> Maxima of convoluted bands are given in bold. The experimental values are given with peak width (fwhm in parenthesis) and are assigned to the most dominant vibrations.

| Mode <sup>b</sup>                                                    | $\text{AmaH}^+(\text{I})$<br>$C_{3v}$                                                                                                  | $\text{AmaH}^+(\text{II})$<br>$C_s$                                                    | $\text{AmaH}^+(\text{III})$<br>$C_s$                                                                    | $\text{AmaH}^+(\text{IV})$<br>$C_s$                                                                                           | $\text{AmaH}^+\text{Ar}$<br>Exp.        |
|----------------------------------------------------------------------|----------------------------------------------------------------------------------------------------------------------------------------|----------------------------------------------------------------------------------------|---------------------------------------------------------------------------------------------------------|-------------------------------------------------------------------------------------------------------------------------------|-----------------------------------------|
| $\tau_{\text{CH}_2}, \rho_{\text{CH}_2}$                             | <b>1117</b><br>1117 (6)<br>1117 (6)<br>1118 (0)<br>1127 (0)                                                                            | <b>1113</b><br>1112 (0.3)<br>1113 (15)                                                 | <b>1106</b><br>1106 (8)<br>1116 (1)<br>1123 (2)                                                         | <b>1117</b><br>1108 (0.7)<br>1117 (22)<br>1134 (2)                                                                            |                                         |
| $\tau_{\text{CH}_2}$                                                 |                                                                                                                                        | <b>1156</b> (2)                                                                        | <b>1150</b> (4)                                                                                         | <b>1151</b> (0.8)                                                                                                             |                                         |
| $\tau_{\text{CH}_2}$                                                 | <b>1206</b><br>1206 (4)<br>1206 (4)                                                                                                    | <b>1203</b><br>1199 (0.2)<br>1203 (15)                                                 | <b>1192</b><br>1192 (29)<br>1203 (2)<br>1214 (0.1)                                                      | <b>1220</b><br>1197 (0.9)<br>1220 (5)                                                                                         | <b>A</b> 1187 (12)<br><b>B</b> 1209 (2) |
| $\tau_{\text{CH}_2}$                                                 |                                                                                                                                        | <b>1251</b><br>1248 (2)<br>1253 (2)                                                    | <b>1235</b> (15)                                                                                        |                                                                                                                               |                                         |
| $\tau_{\text{CH}_2}, \gamma_{\text{CH}_2}$                           | <b>1294</b><br>1278 (0.02)<br>1278 (0.02)<br>1285 (0)<br>1294 (27)<br>1297 (0.5)<br>1297 (0.5)<br>1321 (0.1)<br>1321 (0.1)<br>1325 (0) | <b>1297</b><br>1283 (3)<br>1297 (14)<br>1302 (2)<br>1314 (1.4)<br>1324 (2)<br>1330 (1) | <b>1281</b><br>1281 (10)<br>1285 (1)<br>1300 (0.8)<br><b>1308</b><br>1307 (4)<br>1314 (1)<br>1327 (0.4) | <b>1279</b><br>1261 (1)<br>1267 (0.2)<br>1279 (3)<br>1299 (3)<br><b>1324</b><br>1315 (2)<br>1324 (10)<br>1334 (1)<br>1340 (8) | <b>C</b> 1322 (8)                       |
| $\gamma_{\text{CH}_2}, \tau_{\text{CH}_2}$                           | <b>1359</b><br>1355 (0.7)<br>1355 (0.7)<br>1359 (18)<br>1371 (0.7)<br>1371 (0.7)                                                       | <b>1346</b><br>1346 (13)<br>1355 (1)<br>1356 (2)<br>1369 (1)                           | <b>1349</b><br>1338 (0.5)<br>1349 (2)<br>1357 (0.5)<br>1369 (0.4)                                       |                                                                                                                               | <b>D</b> 1377 (11)                      |
| $\rho_{\text{NH}_2},$<br>$\gamma_{\text{CH}_2}, \beta_{\text{CH}_2}$ |                                                                                                                                        | <b>1415</b><br>1390 (16)<br>1393 (2)<br>1409 (12)<br>1417 (23)                         | <b>1396</b><br>1392 (4)<br>1397 (10)                                                                    | <b>1384</b><br>1356 (1)<br>1364 (3)<br>1365 (0.1)<br>1368 (1)<br>1382 (33)<br>1395 (6)<br>1399 (19)<br>1401 (0.3)             |                                         |
| $\beta_{\text{CH}_2}$                                                |                                                                                                                                        |                                                                                        | <b>1441</b><br>1436 (17)<br>1443 (21)                                                                   | <b>1455</b><br>1452 (4)<br>1452 (13)<br>1459 (2)<br>1469 (12)<br>1476 (5)                                                     | <b>E</b> 1453 (13)                      |

|                                                          |                                                                                                                  |                                                                                                      |                                                                                                                               |                                                                                                       |                                        |
|----------------------------------------------------------|------------------------------------------------------------------------------------------------------------------|------------------------------------------------------------------------------------------------------|-------------------------------------------------------------------------------------------------------------------------------|-------------------------------------------------------------------------------------------------------|----------------------------------------|
| $\gamma_{\text{NH}_3}$ (umbrella), $\beta_{\text{CH}_2}$ | <b>1441</b><br>1441 (130)<br>1450 (0.07)<br>1450 (0.07)                                                          |                                                                                                      |                                                                                                                               |                                                                                                       | <b>E</b> 1453 (13)                     |
| $\beta_{\text{CH}_2}$<br>$\beta_{\text{CH}_3}$           | <b>1469</b><br>1463 (13)<br>1463 (13)<br>1472 (39)<br>1493 (7)                                                   | <b>1462</b><br>1450 (4)<br>1453 (10)<br>1463 (8)<br>1465 (10)<br>1476 (9)                            | <b>1468</b><br>1455 (0.2)<br>1462 (8)<br>1465 (6)<br>1469 (16)<br>1474 (7)                                                    |                                                                                                       | <b>F</b> 1474 (6)<br><b>G</b> 1483 (5) |
| $\nu_{\text{CN}}^{\text{c}}$                             |                                                                                                                  | <b>1534</b> (7)                                                                                      | <b>1541</b> (3)                                                                                                               | <b>1534</b> (5)                                                                                       |                                        |
| $\beta_{\text{NH}_3}$                                    | <b>1611</b><br>1611 (39)<br>1611 (39)                                                                            |                                                                                                      |                                                                                                                               |                                                                                                       | <b>H</b> 1611 (12)                     |
| $\beta_{\text{NH}_2}^{\text{c}}$                         |                                                                                                                  | <b>1664</b> (219)                                                                                    | <b>1669</b> (206)                                                                                                             | <b>1665</b> (203)                                                                                     | <b>I</b> 1714 (15)                     |
| $\nu_{\text{CH}}$                                        |                                                                                                                  | <b>2848</b> (60)                                                                                     |                                                                                                                               |                                                                                                       | <b>J</b> 2853 (10)                     |
| $\nu_{\text{CH/CH}_2}$                                   | <b>2899</b><br>2892 (11)<br>2892 (12)<br>2899 (47)<br>2916 (25)<br>2916 (25)<br>2917 (0.3)<br>2930 (0)           |                                                                                                      | <b>2882</b><br>2883 (24)<br>2884 (9)                                                                                          | <b>2874</b><br>2871 (8)<br>2876 (11)                                                                  | <b>K</b> 2872 (7)                      |
| $\nu_{\text{CH}_2}$                                      |                                                                                                                  | <b>2913</b><br>2885 (5)<br>2891 (10)<br>2908 (19)<br>2910 (4)<br>2915 (37)<br>2917 (9)               | <b>2917</b><br>2904 (6)<br>2913 (0.4)<br>2915 (33)<br>2919 (9)<br>2929 (17)                                                   | <b>2916</b><br>2911 (3)<br>2913 (20)<br>2914 (22)<br>2924 (10)<br>2930 (17)                           | <b>L</b> 2921 (14)                     |
| $\nu_{\text{CH}_2}$                                      | <b>2956</b><br>2935 (34)<br>2935 (34)<br>2953 (38)<br>2953 (38)<br>2955 (0)<br>2958 (1)<br>2958 (1)<br>2964 (43) | <b>2952</b><br>2942 (10)<br>2944 (19)<br>2952 (6)<br>2953 (14)<br>2954 (26)<br>2955 (7)<br>2966 (13) |                                                                                                                               | <b>2948</b><br>2944 (20)<br>2946 (2)<br>2948 (0.6)<br>2948 (14)<br>2949 (6)<br>2950 (31)<br>2966 (15) | <b>M</b> 2949 (17)                     |
| $\nu_{\text{CH}_3}$                                      |                                                                                                                  | <b>2977</b><br>2977 (25)<br>2982 (18)                                                                | <b>2972</b><br>2954 (0.3)<br>2955 (8)<br>2666 (17)<br>2969 (25)<br>2971 (9)<br>2972 (9)<br>2974 (9)<br>2977 (21)<br>2983 (16) | <b>2998</b><br>2979 (16)<br>2998 (50)                                                                 | <b>N</b> 2973 (5)                      |
| $2\beta_{\text{NH}_3}$                                   | 3222                                                                                                             |                                                                                                      |                                                                                                                               |                                                                                                       | <b>O</b> 3164 (7)<br><b>P</b> 3185 (5) |
| $\nu_{\text{NH}_3}^{\text{s}}$                           | <b>3214</b> (26)                                                                                                 |                                                                                                      |                                                                                                                               |                                                                                                       | <b>Q</b> 3238 (13)                     |
| $\nu_{\text{NH}_3}^{\text{a}}$                           | <b>3301</b><br>3301 (52)<br>3301 (52)                                                                            |                                                                                                      |                                                                                                                               |                                                                                                       | <b>R</b> 3317 (21)                     |
| $\nu_{\text{NH}_2}^{\text{s}}$                           |                                                                                                                  | <b>3331</b> (136)                                                                                    | <b>3330</b> (129)                                                                                                             | <b>3329</b> (129)                                                                                     | <b>S</b> 3344 (7)                      |

|                                   |  |                  |                  |                  |                    |
|-----------------------------------|--|------------------|------------------|------------------|--------------------|
| $2\beta_{\text{NH}_2}^{\text{c}}$ |  | 3328             | 3338             | 3330             | <b>T</b> 3428 (11) |
| $\nu_{\text{NH}_2}^{\text{a}}$    |  | <b>3435</b> (77) | <b>3433</b> (76) | <b>3432</b> (78) | <b>U</b> 3451 (10) |

<sup>a</sup> IR intensities in  $\text{km mol}^{-1}$  are given in parentheses. <sup>b</sup> Stretching ( $\nu$ ), bending ( $\beta$ ), torsion ( $\tau$ ), wagging ( $\gamma$ ), rocking ( $\rho$ ). <sup>c</sup> Coupled  $\beta_{\text{NH}_2}/\nu_{\text{CN}}$  modes.

**Table S2.** Various energies of AmaH<sup>+</sup>(**I-IV**) isomers (in kJ mol<sup>-1</sup>) calculated at the B3LYP-D3/cc-pVTZ level.

|                                  | $E_0$  | $E_e$  |
|----------------------------------|--------|--------|
| AmaH <sup>+</sup> ( <b>I</b> )   | 0      | 0      |
| AmaH <sup>+</sup> ( <b>II</b> )  | 3.03   | 15.72  |
| AmaH <sup>+</sup> ( <b>III</b> ) | 27.39  | 39.42  |
| AmaH <sup>+</sup> ( <b>IV</b> )  | 29.50  | 42.50  |
| <b>TS I-IV</b>                   | 262.90 | 287.47 |
| <b>TS III-IV</b>                 | 43.48  | 56.33  |

**Table S3.** Computed vibrational frequencies (in  $\text{cm}^{-1}$ , B3LYP-D3/cc-pVTZ) of Ama compared to calculated vibrational frequencies of  $\text{AmaH}^+(\text{I-IV})$  (Figure S4).<sup>a</sup> Maxima of convoluted bands are given in bold. Stretching ( $\nu$ ), bending ( $\beta$ ), torsion ( $\tau$ ), wagging ( $\gamma$ ), rocking ( $\rho$ ).

| Mode of Ama                                                    | Ama                                                                                        | Mode of $\text{Ama}^+$                                                                                     | $\text{AmaH}^+(\text{I})$                                                                                                                    | $\text{AmaH}^+(\text{II})$                                                             | $\text{AmaH}^+(\text{III})$                                                                             | $\text{AmaH}^+(\text{IV})$                                                                                                    |
|----------------------------------------------------------------|--------------------------------------------------------------------------------------------|------------------------------------------------------------------------------------------------------------|----------------------------------------------------------------------------------------------------------------------------------------------|----------------------------------------------------------------------------------------|---------------------------------------------------------------------------------------------------------|-------------------------------------------------------------------------------------------------------------------------------|
| $\tau_{\text{CH}_2}, \gamma_{\text{CH}_2}$                     | <b>1256</b><br>1256 (4)<br>1274 (0.0)<br>1277 (0.2)<br>1279 (0.0)                          | $\tau_{\text{CH}_2}, \rho_{\text{CH}_2}$                                                                   | <b>1117</b><br>1117 (6)<br>1117 (6)<br>1118 (0)<br>1127 (0)                                                                                  | <b>1113</b><br>1112 (0.3)<br>1113 (15)                                                 | <b>1106</b><br>1106 (8)<br>1116 (1)<br>1123 (2)                                                         | <b>1117</b><br>1108 (0.7)<br>1117 (22)<br>1134 (2)                                                                            |
|                                                                |                                                                                            | $\tau_{\text{CH}_2},$                                                                                      |                                                                                                                                              | <b>1156</b> (2)                                                                        | <b>1150</b> (4)                                                                                         | <b>1151</b> (0.8)                                                                                                             |
|                                                                |                                                                                            | $\tau_{\text{CH}_2}$                                                                                       | <b>1206</b><br>1206 (4)<br>1206 (4)                                                                                                          | <b>1203</b><br>1199 (0.2)<br>1203 (15)                                                 | <b>1192</b><br>1192 (29)<br>1203 (2)<br>1214 (0.1)                                                      |                                                                                                                               |
| $\gamma_{\text{CH}_2}$                                         | <b>1308</b><br>1308 (5)<br>1311 (1)<br>1313 (1)<br>1319 (0.0)<br>1320 (0.0)                | $\tau_{\text{CH}_2}$                                                                                       |                                                                                                                                              | <b>1251</b><br>1248 (2)<br>1253 (2)                                                    | <b>1235</b> (15)                                                                                        | <b>1220</b><br>1197 (0.9)<br>1220 (5)                                                                                         |
|                                                                |                                                                                            | $\tau_{\text{CH}_2}, \gamma_{\text{CH}_2},$                                                                | <b>1294</b><br>1278<br>(0.02)<br>1278<br>(0.02)<br>1285 (0)<br>1294 (27)<br>1297 (0.5)<br>1297 (0.5)<br>1321 (0.1)<br>1321 (0.1)<br>1325 (0) | <b>1297</b><br>1283 (3)<br>1297 (14)<br>1302 (2)<br>1314 (1.4)<br>1324 (2)<br>1330 (1) | <b>1281</b><br>1281 (10)<br>1285 (1)<br>1300 (0.8)<br><b>1307</b><br>1307 (4)<br>1314 (1)<br>1327 (0.4) | <b>1279</b><br>1261 (1)<br>1267 (0.2)<br>1279 (3)<br>1299 (3)<br><b>1324</b><br>1315 (2)<br>1324 (10)<br>1334 (1)<br>1340 (8) |
| $\tau_{\text{CH}_2}, \gamma_{\text{CH}_2}, \tau_{\text{NH}_2}$ | <b>1360</b><br>1342 (0.2)<br>1351 (1)<br>1358 (3)<br>1364 (2)<br>1373 (0.1)                | $\tau_{\text{CH}_2}, \gamma_{\text{CH}_2},$                                                                | <b>1359</b><br>1355 (0.7)<br>1355 (0.7)<br>1359 (18)<br>1371 (0.7)<br>1371 (0.7)                                                             | <b>1346</b><br>1346 (13)<br>1355 (1)<br>1356 (2)<br>1369 (1)                           | <b>1349</b><br>1338 (0.5)<br>1349 (2)<br>1357 (0.5)<br>1369 (0.4)                                       |                                                                                                                               |
| $\beta_{\text{CH}_2}$                                          | <b>1461</b><br>1446 (0.0)<br>1448 (0.0)<br>1461 (8)<br>1461 (10)<br>1463 (8)<br>1486 (0.1) | $\rho_{\text{NH}_2}, \gamma_{\text{CH}_3}$<br>(umbrella), $\gamma_{\text{CH}_2},$<br>$\beta_{\text{CH}_2}$ |                                                                                                                                              | <b>1415</b><br>1390 (16)<br>1393 (2)<br>1409 (12)<br>1417 (23)                         | <b>1396</b><br>1392 (4)<br>1397 (10)                                                                    | <b>1384</b><br>1356 (1)<br>1364 (3)<br>1365 (0.1)<br>1368 (1)<br>1382 (33)<br>1395 (6)<br>1399 (19)<br>1401 (0.3)             |
|                                                                |                                                                                            | $\gamma_{\text{NH}_3}$ (umbrella),<br>$\beta_{\text{CH}_2}$                                                | <b>1441</b><br>1441 (130)<br>1450 (0.1)<br>1450 (0.1)                                                                                        |                                                                                        | <b>1441</b><br>1436 (17)<br>1443 (21)                                                                   | <b>1455</b><br>1452 (4)<br>1452 (13)<br>1459 (2)<br>1469 (12)<br>1476 (5)                                                     |
|                                                                |                                                                                            | $\beta_{\text{CH}_3}, \beta_{\text{CH}_2}$                                                                 | <b>1469</b><br>1463 (13)<br>1463 (13)                                                                                                        | <b>1462</b><br>1450 (4)<br>1453 (10)                                                   | <b>1467</b><br>1455 (0.2)<br>1462 (8)                                                                   |                                                                                                                               |

|                                      |                                                                                                                                   |                                  |                                                                                                                  |                                                                                                      |                                                                                                                               |                                                                                                       |
|--------------------------------------|-----------------------------------------------------------------------------------------------------------------------------------|----------------------------------|------------------------------------------------------------------------------------------------------------------|------------------------------------------------------------------------------------------------------|-------------------------------------------------------------------------------------------------------------------------------|-------------------------------------------------------------------------------------------------------|
|                                      |                                                                                                                                   |                                  | 1472 (39)<br>1493 (7)                                                                                            | 1463 (8)<br>1465 (10)<br>1476 (9)                                                                    | 1465 (6)<br>1469 (16)<br>1474 (7)                                                                                             |                                                                                                       |
| $\beta_{\text{NH}_2}$                | <b>1609</b> (34)                                                                                                                  | $\beta_{\text{NH}_3}$            | <b>1611</b><br>1611 (39)<br>1611 (39)                                                                            |                                                                                                      |                                                                                                                               |                                                                                                       |
|                                      |                                                                                                                                   | $\nu_{\text{CN}}^{\text{b}}$     |                                                                                                                  | <b>1534</b> (7)                                                                                      | <b>1541</b> (3)                                                                                                               | <b>1534</b> (5)                                                                                       |
|                                      |                                                                                                                                   | $\beta_{\text{NH}_2}^{\text{b}}$ |                                                                                                                  | <b>1664</b> (219)                                                                                    | <b>1669</b> (206)                                                                                                             | <b>1665</b> (203)                                                                                     |
| $\nu_{\text{CH}}, \nu_{\text{CH}_2}$ | <b>2890</b><br>2880 (15)<br>2885 (28)<br>2890 (60)<br>2891 (4)<br>2892 (19)<br>2893 (28)                                          | $\nu_{\text{CH}}$                |                                                                                                                  | <b>2848</b> (60)                                                                                     |                                                                                                                               |                                                                                                       |
|                                      |                                                                                                                                   | $\nu_{\text{CH/CH}_2}$           | <b>2899</b><br>2892 (11)<br>2892 (12)<br>2899 (47)<br>2916 (25)<br>2916 (25)<br>2917 (0.3)<br>2930 (0)           |                                                                                                      | <b>2882</b><br>2883 (24)<br>2884 (9)                                                                                          | <b>2874</b><br>2871 (8)<br>2876 (11)                                                                  |
|                                      |                                                                                                                                   | $\nu_{\text{CH}_2}$              |                                                                                                                  | <b>2913</b><br>2885 (5)<br>2891 (10)<br>2908 (19)<br>2910 (4)<br>2915 (37)<br>2917 (9)               | <b>2917</b><br>2904 (6)<br>2913 (0.4)<br>2915 (33)<br>2919 (9)<br>2929 (17)                                                   | <b>2916</b><br>2911 (3)<br>2913 (20)<br>2914 (22)<br>2924 (10)<br>2930 (17)                           |
|                                      | <b>2917</b><br>2913 (113)<br>2914 (68)<br>2916 (92)<br>2922 (28)<br>2926 (12)<br>2926 (46)<br>2932 (100)<br>2936 (5)<br>2941 (81) | $\nu_{\text{CH}_2}$              | <b>2956</b><br>2935 (34)<br>2935 (34)<br>2953 (38)<br>2953 (38)<br>2955 (0)<br>2958 (1)<br>2958 (1)<br>2964 (43) | <b>2952</b><br>2942 (10)<br>2944 (19)<br>2952 (6)<br>2953 (14)<br>2954 (26)<br>2955 (7)<br>2966 (13) | <b>2972</b><br>2954 (0.3)<br>2955 (8)<br>2666 (17)<br>2969 (25)<br>2971 (9)<br>2972 (9)<br>2974 (9)<br>2977 (21)<br>2983 (16) | <b>2948</b><br>2944 (20)<br>2946 (2)<br>2948 (0.6)<br>2948 (14)<br>2949 (6)<br>2950 (31)<br>2966 (15) |
|                                      |                                                                                                                                   | $\nu_{\text{CH}_3}$              |                                                                                                                  | <b>2977</b><br>2977 (25)<br>2982 (18)                                                                |                                                                                                                               | <b>2998</b><br>2979 (16)<br>2998 (50)                                                                 |
| $\nu_{\text{NH}_2}^{\text{s}}$       | <b>3285</b> (3)                                                                                                                   | $\nu_{\text{NH}_3}^{\text{s}}$   | <b>3214</b> (26)                                                                                                 |                                                                                                      |                                                                                                                               |                                                                                                       |
|                                      |                                                                                                                                   | $\nu_{\text{NH}_2}^{\text{s}}$   |                                                                                                                  | <b>3331</b> (136)                                                                                    | <b>3330</b> (129)                                                                                                             | <b>3329</b> (129)                                                                                     |
| $\nu_{\text{NH}_2}^{\text{a}}$       | <b>3359</b> (0.2)                                                                                                                 | $\nu_{\text{NH}_3}^{\text{a}}$   | <b>3301</b><br>3301 (52)<br>3301 (52)                                                                            |                                                                                                      |                                                                                                                               |                                                                                                       |
|                                      |                                                                                                                                   | $\nu_{\text{NH}_2}^{\text{a}}$   |                                                                                                                  | <b>3435</b> (77)                                                                                     | <b>3433</b> (76)                                                                                                              | <b>3432</b> (78)                                                                                      |

<sup>a</sup> IR intensities in  $\text{km mol}^{-1}$  are given in parentheses. <sup>b</sup> Coupled  $\beta_{\text{NH}_2}/\nu_{\text{CN}}$  modes.



**Table S4.** Computed vibrational frequencies (in  $\text{cm}^{-1}$ , B3LYP-D3/cc-pVTZ) of  $\text{Ama}^+(\text{I-III})$  compared to experimental values of  $\text{Ama}^+\text{Ar}$ .<sup>a</sup> Maxima of convoluted bands are given in bold. The experimental values are given with peak width (fwhm in parenthesis) and are assigned to the most dominant vibrations.

| Mode <sup>d</sup>                                                      | $\text{Ama}^+(\text{I})$                                                                      | $\text{Ama}^+(\text{II})$                                                                             | $\text{Ama}^+(\text{III})$                                                                         | $\text{Ama}^+\text{-Ar}$<br>Exp.                             |
|------------------------------------------------------------------------|-----------------------------------------------------------------------------------------------|-------------------------------------------------------------------------------------------------------|----------------------------------------------------------------------------------------------------|--------------------------------------------------------------|
| $\rho_{\text{NH}_2}$ , $\tau_{\text{CH}_2}$ , $\gamma_{\text{CH}_2}$   | <b>1226</b><br>1226 (22)<br>1243 (0.001)                                                      |                                                                                                       | <b>1226</b><br>1218 (2)<br>1227 (10)                                                               | <b>R</b> 1228 (15)                                           |
| $\gamma_{\text{CH}_2}$                                                 |                                                                                               | <b>1247</b> (22)                                                                                      |                                                                                                    |                                                              |
| $\tau_{\text{CH}_2}$ , $\gamma_{\text{CH}_2}$                          | <b>1274</b><br>1254 (1.3)<br>1271 (0.01)<br>1273 (0.1)<br>1274 (26)<br>1296 (5)<br>1307 (0.4) | <b>1285</b><br>1283 (1)<br>1285 (4)                                                                   | <b>1301</b><br>1261 (1)<br>1280 (3)<br>1292 (1)<br>1301 (14)<br>1316 (5)                           |                                                              |
| $\gamma_{\text{CH}_2}$                                                 | <b>1346</b><br>1320 (0.1)<br>1325 (2)<br>1345 (2)<br>1345 (1)<br>1352 (2)<br>1362 (0.2)       | <b>1310</b><br>1306 (3)<br>1311 (2)<br>1323 (1)<br>1330 (0.1)<br>1333 (0.2)<br>1350 (1)<br>1360 (0.2) | <b>1336</b><br>1332 (4)<br>1338 (7)<br>1348 (2)                                                    |                                                              |
| $\rho_{\text{NH}_2}$ , $\gamma_{\text{CH}_2}$ , $\gamma_{\text{CH}_3}$ |                                                                                               | <b>1397</b> (10)                                                                                      | <b>1372</b><br>1363 (15)<br>1378 (12)<br>1380 (4)                                                  | <b>S</b> 1368 (35)                                           |
| $\beta_{\text{CH}_2}$ , $\beta_{\text{CH}_3}$                          | <b>1458</b><br>1435 (5)<br>1439 (1)<br>1450 (15)<br>1460 (12)<br>1463 (14)<br>1484 (1)        | <b>1441</b><br>1430 (1)<br>1438 (17)<br>1445 (20)<br><b>1469</b><br>1464 (3)<br>1469 (17)<br>1473 (3) | <b>1440</b><br>1421 (6)<br>1430 (0)<br>1431 (16)<br>1442 (11)<br>1442 (28)<br>1447 (5)<br>1467 (5) | <b>P</b> 1458 (25)                                           |
| $\nu_{\text{CN}}^e$                                                    |                                                                                               |                                                                                                       | <b>1500</b> (93)                                                                                   | <b>T</b> 1551 (7)                                            |
| $\nu_{\text{CN}}^e$                                                    |                                                                                               | <b>1542</b> (4)                                                                                       |                                                                                                    |                                                              |
| $\beta_{\text{NH}_2}$                                                  | <b>1595</b> (70)                                                                              |                                                                                                       |                                                                                                    | <b>Q<sub>1</sub></b> 1599 (6)                                |
| $\beta_{\text{NH}_2}^e$                                                |                                                                                               |                                                                                                       | <b>1641</b> (216)                                                                                  | <b>Q<sub>2</sub></b> 1664 (13)                               |
| $\beta_{\text{NH}_2}^e$                                                |                                                                                               | <b>1670</b> (208)                                                                                     |                                                                                                    | <b>Q<sub>3</sub></b> 1717 (7)                                |
| $\nu_{\text{CH}}$                                                      |                                                                                               | <b>2821</b> (8)                                                                                       |                                                                                                    | <b>A</b> 2842 (4)                                            |
| $\nu_{\text{CH}}$                                                      | <b>2840</b> (75)                                                                              |                                                                                                       |                                                                                                    | <b>B</b> 2864 (11)                                           |
| $\nu_{\text{CH}_2}$ , $\nu_{\text{CH}_3}$                              |                                                                                               |                                                                                                       | <b>2878</b><br>2858 (0.3)<br>2873 (2)<br>2878 (16)                                                 | <b>B</b> 2864 (11)                                           |
| $\nu_{\text{CH}_2}$ , $\nu_{\text{CH}_3}$                              | <b>2920</b><br>2908 (4)<br>2912 (16)<br>2921 (16)<br>2923 (20)<br>2925 (10)                   | <b>2901</b><br>2898 (10)<br>2901 (40)<br><b>2926</b><br>2916 (0.3)<br>2921 (8)<br>2929 (11)           | <b>2905</b><br>2898 (0)<br>2905 (9)<br><b>2926</b><br>2925 (10)<br>2930 (6)                        | <b>C</b> 2920 (6)                                            |
| $\nu_{\text{CHn}}$                                                     | <b>2955</b><br>2949 (5)<br>2950 (28)<br>2951 (1)<br>2952 (10)                                 | <b>2972</b><br>2955 (0)<br>2956 (13)<br>2970 (25)<br>2971 (5)                                         | <b>2961</b><br>2951 (5)<br>2953 (11)<br>2957 (11)<br>2959 (20)                                     | <b>D</b> 2947 (25)<br><b>E</b> 2959 (6)<br><b>F</b> 2978 (4) |

|                          |                                                |                                              |                                                |                                |
|--------------------------|------------------------------------------------|----------------------------------------------|------------------------------------------------|--------------------------------|
|                          | 2961 (6)<br>2962 (11)<br>2966 (4)<br>2971 (27) | 2974 (8)<br>2974 (9)<br>2976 (8)             | 2963 (7)<br>2965 (28)<br>2966 (4)<br>2977 (17) |                                |
| $\nu_{\text{CH}_2}$      | 3024 (6)                                       | 3021 (6)                                     |                                                | <b>G</b> 3008 (6)              |
| $\nu_{\text{CH}_2}$      |                                                | 3121 (4)                                     |                                                |                                |
| $2\beta_{\text{NH}_2}$   | 3190 <sup>b</sup><br>3200 (12) <sup>c</sup>    |                                              |                                                | <b>H</b> 3151 (9)              |
| $2\beta_{\text{NH}_2}^e$ |                                                |                                              | 3282 <sup>b</sup><br>3262 (0.7) <sup>c</sup>   | <b>I</b> 3267 (8)              |
| $2\beta_{\text{NH}_2}^e$ |                                                | 3339 <sup>b</sup><br>3289 (0.3) <sup>c</sup> |                                                |                                |
| $\nu_{\text{NH}_2}^s$    | <b>3322</b> (223)                              |                                              |                                                | <b>J<sub>1</sub></b> 3321 (16) |
| $\nu_{\text{NH}_2}^s$    |                                                | <b>3329</b> (131)                            |                                                | <b>J<sub>2</sub></b> 3345 (8)  |
| $\nu_{\text{NH}_2}^s$    |                                                |                                              | <b>3358</b> (173)                              | <b>J<sub>3</sub></b> 3381 (17) |
| $\nu_{\text{NH}_2}^a$    | <b>3438</b> (68)                               |                                              |                                                | <b>K<sub>1</sub></b> 3425 (9)  |
| $\nu_{\text{NH}_2}^a$    |                                                | <b>3433</b> (76)                             |                                                | <b>K<sub>2</sub></b> 3451 (7)  |
| $\nu_{\text{NH}_2}^a$    |                                                |                                              | <b>3467</b> (63)                               | <b>K<sub>3</sub></b> 3477 (11) |

<sup>a</sup> IR intensities in  $\text{km mol}^{-1}$  are given in parentheses (M. A. R. George, O. Dopfer, *J. Phys. Chem. Lett.* **2022**, *13*, 449). <sup>b</sup> Harmonic value. <sup>c</sup> Result of anharmonic calculation.

<sup>d</sup> Stretching ( $\nu$ ), bending ( $\beta$ ), torsion ( $\tau$ ), wagging ( $\gamma$ ), rocking ( $\rho$ ). <sup>e</sup> Coupled  $\beta_{\text{NH}_2}/\nu_{\text{CN}}$  modes.

**Table S5.** Computed vibrational frequencies (in  $\text{cm}^{-1}$ , B3LYP-D3/cc-pVTZ) of  $\text{AmaH}^+(\text{I-IV})\text{-Ar(I)}$  compared to experimental values of  $\text{AmaH}^+\text{Ar}$  (Figure S7-S10).<sup>a</sup> Maxima of convoluted bands are given in bold. The experimental values are given with peak width (fwhm in parenthesis) and are assigned to the most dominant vibrations.

| Mode <sup>b</sup>                                                                                              | $\text{AmaH}^+(\text{I})\text{-Ar(I)}$                                                                                                | $\text{AmaH}^+(\text{II})\text{-Ar(I)}$                                                | $\text{AmaH}^+(\text{III})\text{-Ar(I)}$                                                                | $\text{AmaH}^+(\text{IV})\text{-Ar(I)}$                                                                                      | $\text{AmaH}^+\text{-Ar}$<br>Exp.       |
|----------------------------------------------------------------------------------------------------------------|---------------------------------------------------------------------------------------------------------------------------------------|----------------------------------------------------------------------------------------|---------------------------------------------------------------------------------------------------------|------------------------------------------------------------------------------------------------------------------------------|-----------------------------------------|
| $\tau_{\text{CH}_2}$ , $\rho_{\text{CH}_2}$                                                                    | <b>1117</b><br>1116 (4)<br>1117 (5)<br>1118 (2)<br>1126 (0.1)                                                                         | <b>1113</b><br>1111 (0.3)<br>1113 (16)                                                 | <b>1106</b><br>1106 (7)<br>1116 (1)<br>1124 (2)                                                         | <b>1118</b><br>1109 (0.9)<br>1118 (21)<br>1134 (1)                                                                           |                                         |
| $\tau_{\text{CH}_2}$                                                                                           |                                                                                                                                       | <b>1155</b> (2)                                                                        | <b>1150</b> (5)                                                                                         | <b>1152</b> (0.7)                                                                                                            |                                         |
| $\tau_{\text{CH}_2}$                                                                                           | <b>1206</b><br>1205 (3)<br>1206 (3)                                                                                                   | <b>1203</b><br>1199 (0.5)<br>1203 (14)                                                 | <b>1191</b><br>1191 (29)<br>1203 (2)<br>1214 (0.1)                                                      | <b>1221</b><br>1197 (1)<br>1221 (4)                                                                                          | <b>A</b> 1187 (12)<br><b>B</b> 1209 (2) |
| $\tau_{\text{CH}_2}$                                                                                           |                                                                                                                                       | <b>1251</b><br>1250 (2)<br>1253 (1)                                                    | <b>1234</b> (13)                                                                                        |                                                                                                                              |                                         |
| $\tau_{\text{CH}_2}$ , $\gamma_{\text{CH}_2}$                                                                  | <b>1296</b><br>1278 (0.05)<br>1279 (0.03)<br>1285 (0)<br>1296 (26)<br>1297 (1)<br>1300 (2)<br>1320 (0.2)<br>1322 (0.2)<br>1324 (0.01) | <b>1297</b><br>1282 (3)<br>1297 (13)<br>1301 (2)<br>1316 (2)<br>1324 (1)<br>1331 (0.5) | <b>1282</b><br>1281 (11)<br>1285 (2)<br>1297 (0.6)<br><b>1308</b><br>1307 (3)<br>1314 (2)<br>1325 (0.4) | <b>1280</b><br>1261 (1)<br>1267 (0.3)<br>1280 (3)<br>1300 (3)<br><b>1329</b><br>1316 (2)<br>1325 (9)<br>1334 (1)<br>1341 (8) | <b>C</b> 1322 (8)                       |
| $\gamma_{\text{CH}_2}$ , $\tau_{\text{CH}_2}$                                                                  | <b>1360</b><br>1354 (1)<br>1355 (0.4)<br>1360 (19)<br>1372 (0.6)<br>1373 (1)                                                          | <b>1349</b><br>1349 (10)<br>1352 (2)<br>1356 (2)<br>1369 (1)                           | <b>1348</b><br>1337 (0.6)<br>1348 (2)<br>1357 (0.5)<br>1368 (0.4)                                       |                                                                                                                              | <b>D</b> 1377 (11)                      |
| $\rho_{\text{NH}_2}$ , $\gamma_{\text{CH}_3}$<br>(umbrella), $\gamma_{\text{CH}_2}$ ,<br>$\beta_{\text{CH}_2}$ |                                                                                                                                       | <b>1416</b><br>1392 (16)<br>1394 (2)<br>1411 (11)<br>1419 (23)                         | <b>1396</b><br>1391 (4)<br>1398 (11)                                                                    | <b>1384</b><br>1357 (0.8)<br>1365 (3)<br>1365 (0.3)<br>1368 (2)<br>1384 (31)<br>1391 (3)<br>1401 (18)<br>1403 (1)            |                                         |
| $\beta_{\text{CH}_2}$                                                                                          |                                                                                                                                       |                                                                                        | <b>1441</b><br>1438 (15)<br>1446 (19)                                                                   | <b>1461</b><br>1452 (2)<br>1453 (11)<br>1459 (5)<br>1469 (13)<br>1480 (7)                                                    | <b>E</b> 1453 (13)                      |

|                                                             |                                                                                                                    |                                                                                                                     |                                                                                                                                 |                                                                                                    |                                        |
|-------------------------------------------------------------|--------------------------------------------------------------------------------------------------------------------|---------------------------------------------------------------------------------------------------------------------|---------------------------------------------------------------------------------------------------------------------------------|----------------------------------------------------------------------------------------------------|----------------------------------------|
| $\gamma_{\text{NH}_3}$ (umbrella),<br>$\beta_{\text{CH}_2}$ | <b>1442</b><br>1442 (110)<br>1448 (0.7)<br>1453 (0.7)                                                              |                                                                                                                     |                                                                                                                                 |                                                                                                    | <b>E 1453 (13)</b>                     |
| $\beta_{\text{CH}_2}$<br>$\beta_{\text{CH}_3}$              | <b>1470</b><br>1460 (17)<br>1465 (13)<br>1474 (31)<br>1493 (5)                                                     | <b>1463</b><br>1451 (4)<br>1453 (10)<br>1464 (7)<br>1465 (10)<br>1475 (11)                                          | <b>1470</b><br>1457 (0.8)<br>1463 (9)<br>1468 (6)<br>1471 (18)<br>1474 (4)                                                      |                                                                                                    | <b>F 1474 (6)</b><br><b>G 1483 (5)</b> |
| $\nu_{\text{CN}}^{\text{C}}$                                |                                                                                                                    | <b>1537 (8)</b>                                                                                                     | <b>1544 (6)</b>                                                                                                                 | <b>1534 (8)</b>                                                                                    |                                        |
| $\beta_{\text{NH}_3}$                                       | <b>1612</b><br>1611 (32)<br>1613 (30)                                                                              |                                                                                                                     |                                                                                                                                 |                                                                                                    | <b>H 1611 (12)</b>                     |
| $\beta_{\text{NH}_2}^{\text{C}}$                            |                                                                                                                    | <b>1667 (206)</b>                                                                                                   | <b>1671 (185)</b>                                                                                                               | <b>1668 (187)</b>                                                                                  | <b>I 1714 (15)</b>                     |
| $\nu_{\text{CH}}$                                           |                                                                                                                    | <b>2860 (53)</b>                                                                                                    |                                                                                                                                 |                                                                                                    | <b>J 2853 (10)</b>                     |
| $\nu_{\text{CH/CH}_2}$                                      | <b>2905</b><br>2893 (10)<br>2896 (10)<br>2901 (43)<br>2915 (26)<br>2915 (26)<br>2917 (0.6)<br>2933 (8)             |                                                                                                                     | <b>2886</b><br>2883 (17)<br>2891 (11)                                                                                           | <b>2874</b><br>2871 (8)<br>2876 (11)                                                               | <b>K 2872 (7)</b>                      |
| $\nu_{\text{CH}_2}$                                         |                                                                                                                    | <b>2913</b><br>2887 (5)<br>2893 (9)<br>2908 (15)<br>2910 (4)<br>2915 (40)<br>2917 (9)                               | <b>2917</b><br>2904 (5)<br>2915 (33)<br>2916 (3)<br>2922 (9)<br>2927 (14)                                                       | <b>2916</b><br>2910 (3)<br>2914 (23)<br>2914 (20)<br>2924 (11)<br>2931 (19)                        | <b>L 2921 (14)</b>                     |
| $\nu_{\text{CH}_2}$                                         | <b>2952</b><br>2938 (24)<br>2941 (32)<br>2953 (38)<br>2953 (41)<br>2955 (0.2)<br>2958 (2)<br>2958 (2)<br>2964 (46) | <b>2953</b><br>2943 (13)<br>2947 (19)<br>2952 (13)<br>2953 (13)<br>2954 (26)<br>2955 (15)<br>2962 (11)<br>2966 (12) |                                                                                                                                 | <b>2948</b><br>2944 (22)<br>2945 (2)<br>2948 (3)<br>2948 (9)<br>2949 (31)<br>2958 (5)<br>2966 (15) | <b>M 2949 (17)</b>                     |
| $\nu_{\text{CH}_3}$                                         |                                                                                                                    | <b>2977</b><br>2976 (27)<br>2980 (18)                                                                               | <b>2973</b><br>2953 (0.7)<br>2954 (8)<br>2666 (15)<br>2969 (23)<br>2971 (15)<br>2974 (11)<br>2977 (19)<br>2983 (3)<br>2983 (21) | <b>3009</b><br>2980 (17)<br>3009 (47)                                                              | <b>N 2973 (5)</b>                      |
| $2\beta_{\text{NH}_3}$                                      | 3222                                                                                                               |                                                                                                                     |                                                                                                                                 |                                                                                                    | <b>O 3164 (7)</b>                      |
| $2\beta_{\text{NH}_3}$                                      | 3226                                                                                                               |                                                                                                                     |                                                                                                                                 |                                                                                                    | <b>P 3185 (5)</b>                      |
| $\nu_{\text{NH}_3}^{\text{S}}$                              | <b>3210 (53)</b>                                                                                                   |                                                                                                                     |                                                                                                                                 |                                                                                                    | <b>Q 3238 (13)</b>                     |
| $\nu_{\text{NH}_3}^{\text{a}}$                              | <b>3301</b><br>3289 (123)                                                                                          |                                                                                                                     |                                                                                                                                 |                                                                                                    | <b>R 3317 (21)</b>                     |

|                                   |           |                   |                   |                   |                    |
|-----------------------------------|-----------|-------------------|-------------------|-------------------|--------------------|
|                                   | 3302 (50) |                   |                   |                   |                    |
| $\nu_{\text{NH}_2}^{\text{s}}$    |           | <b>3333</b> (130) | <b>3324</b> (159) | <b>3328</b> (139) | <b>S</b> 3344 (7)  |
| $2\beta_{\text{NH}_2}^{\text{c}}$ |           | 3334              | 3342              | 3336              | <b>T</b> 3428 (11) |
| $\nu_{\text{NH}_2}^{\text{a}}$    |           | <b>3437</b> (82)  | <b>3428</b> (116) | <b>3432</b> (99)  | <b>U</b> 3451 (10) |

<sup>a</sup> IR intensities in  $\text{km mol}^{-1}$  are given in parentheses. <sup>b</sup> Stretching ( $\nu$ ), bending ( $\beta$ ), torsion ( $\tau$ ), wagging ( $\gamma$ ), rocking ( $\rho$ ). <sup>c</sup> Coupled  $\beta_{\text{NH}_2}/\nu_{\text{CN}}$  modes.

**Table S6.** Various energies of the AmaH<sup>+</sup>(I-IV)-Ar(I-VI) isomers (in kJ mol<sup>-1</sup>) calculated at the B3LYP-D3/cc-pVTZ level.

|                                 | $E_0$ | $E_e$ | $D_0$ | $E_0^{\text{total}}$ |
|---------------------------------|-------|-------|-------|----------------------|
| AmaH <sup>+</sup> (I)-Ar(I)     | 0.00  | 0.00  | 10.15 | 0.00                 |
| AmaH <sup>+</sup> (I)-Ar(II)    | 4.10  | 5.04  | 6.05  | 4.10                 |
| AmaH <sup>+</sup> (I)-Ar(III)   | 4.17  | 4.86  | 5.98  | 4.17                 |
| AmaH <sup>+</sup> (I)-Ar(IV)    | 4.94  | 5.30  | 5.21  | 4.94                 |
| AmaH <sup>+</sup> (I)-Ar(V)     | 5.04  | 5.10  | 5.11  | 5.04                 |
| AmaH <sup>+</sup> (II)-Ar(I)    | 0.00  | 0.00  | 9.76  | 3.42                 |
| AmaH <sup>+</sup> (II)-Ar(II)   | 2.34  | 2.63  | 7.42  | 5.77                 |
| AmaH <sup>+</sup> (II)-Ar(III)  | 2.99  | 3.48  | 6.77  | 6.41                 |
| AmaH <sup>+</sup> (II)-Ar(IV)   | 3.38  | 4.06  | 6.38  | 6.81                 |
| AmaH <sup>+</sup> (II)-Ar(V)    | 3.40  | 3.91  | 6.36  | 6.82                 |
| AmaH <sup>+</sup> (II)-Ar(VI)   | 3.56  | 3.91  | 6.20  | 6.98                 |
| AmaH <sup>+</sup> (III)-Ar(I)   | 0.00  | 0.00  | 8.98  | 28.57                |
| AmaH <sup>+</sup> (III)-Ar(II)  | 0.34  | -0.06 | 8.65  | 28.90                |
| AmaH <sup>+</sup> (III)-Ar(III) | 2.07  | 2.57  | 6.92  | 30.63                |
| AmaH <sup>+</sup> (III)-Ar(IV)  | 2.75  | 2.79  | 6.24  | 31.31                |
| AmaH <sup>+</sup> (III)-Ar(V)   | 4.39  | 4.28  | 4.58  | 32.96                |
| AmaH <sup>+</sup> (III)-Ar(VI)  | 6.86  | 7.06  | 2.13  | 35.42                |
| AmaH <sup>+</sup> (IV)-Ar(I)    | 0.00  | 0.00  | 8.94  | 30.72                |
| AmaH <sup>+</sup> (IV)-Ar(II)   | 0.24  | 0.51  | 8.70  | 30.96                |
| AmaH <sup>+</sup> (IV)-Ar(III)  | 0.98  | 1.59  | 7.96  | 31.70                |
| AmaH <sup>+</sup> (IV)-Ar(IV)   | 2.48  | 2.99  | 6.45  | 33.20                |
| AmaH <sup>+</sup> (IV)-Ar(V)    | 2.53  | 3.27  | 6.41  | 33.24                |
| AmaH <sup>+</sup> (IV)-Ar(VI)   | 2.96  | 3.14  | 5.98  | 33.68                |

Figure S1

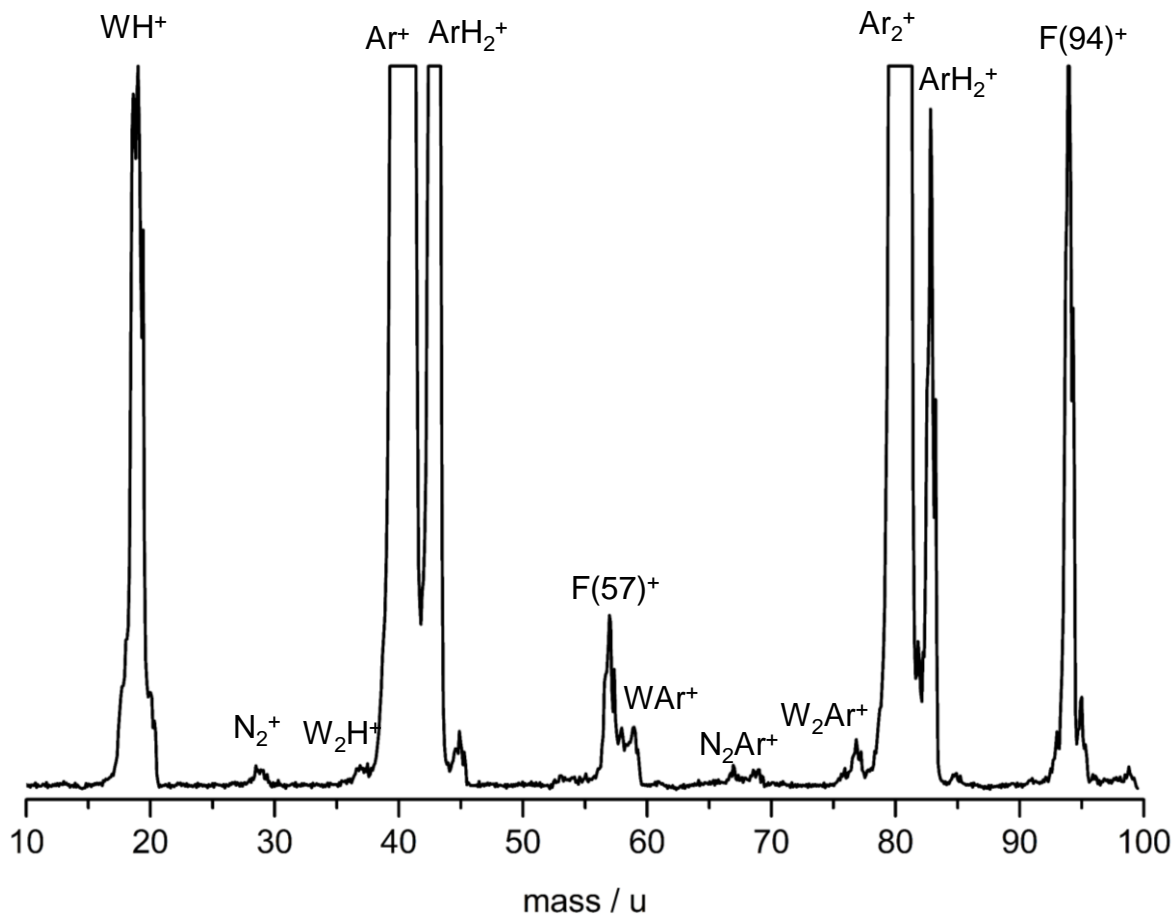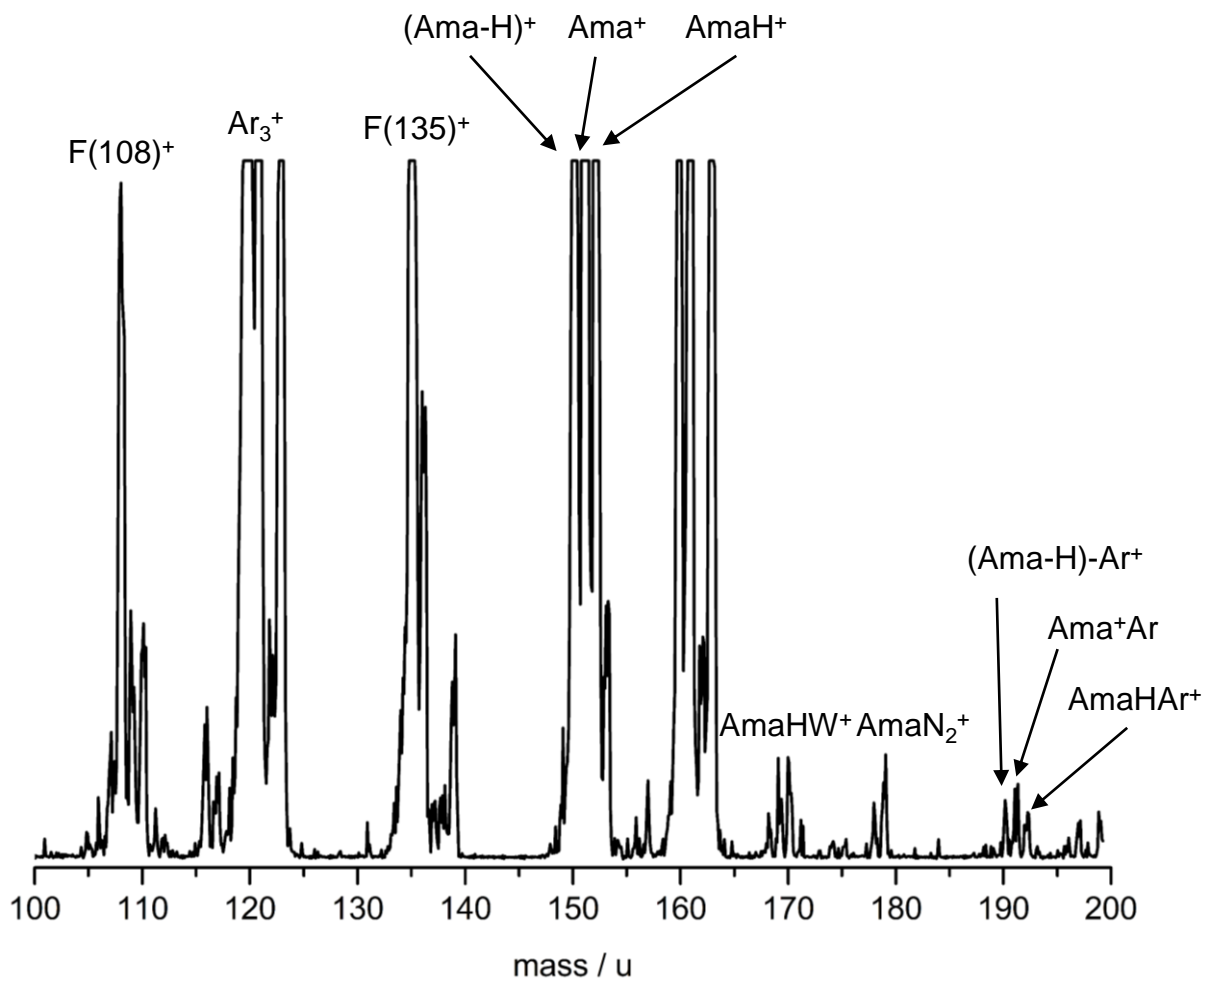

Figure S2

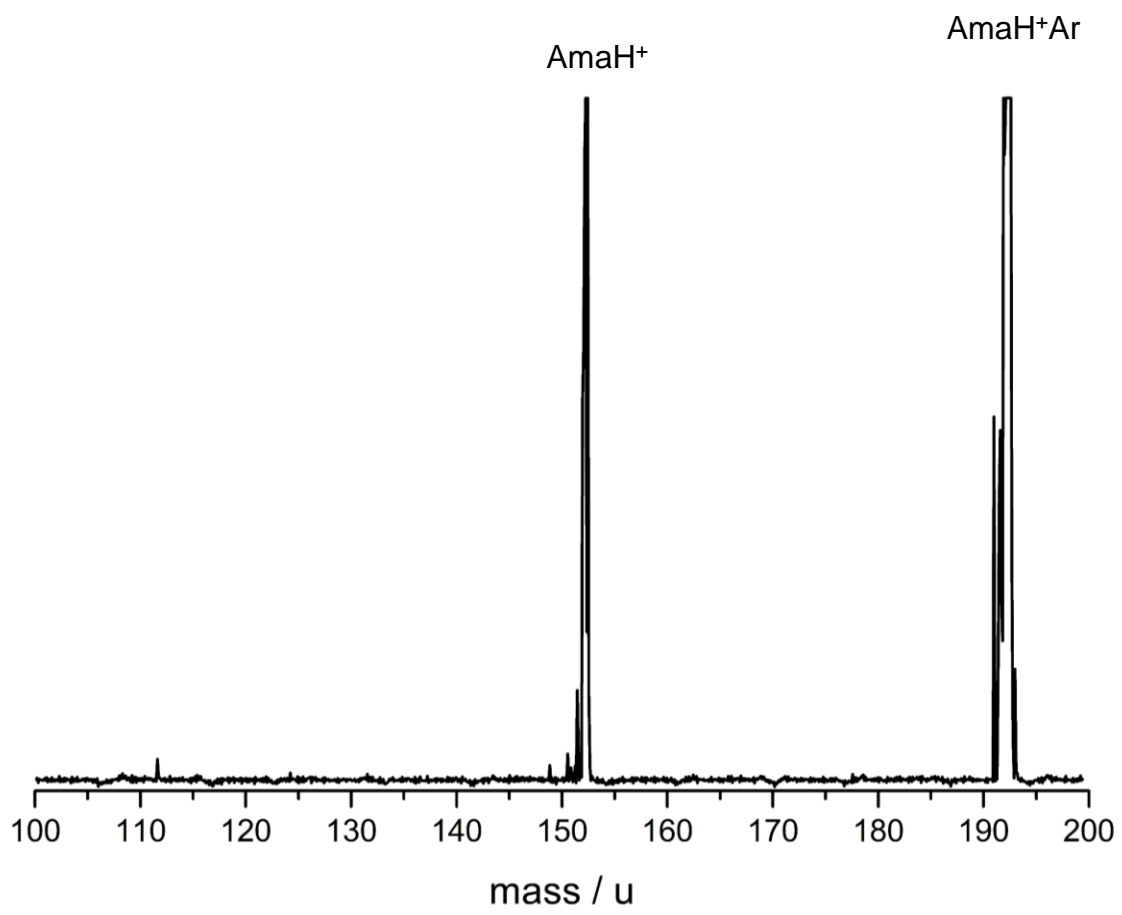



Figure S3

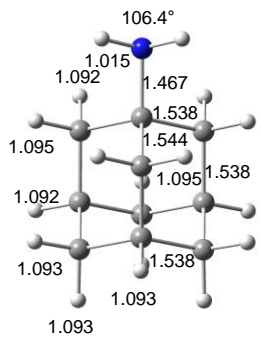

Ama ( $C_s$ )

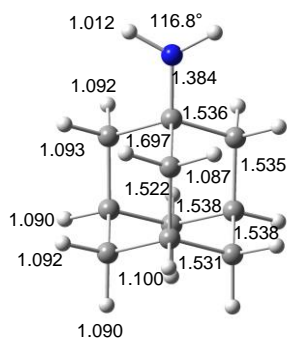

Ama<sup>+</sup>(I) ( $C_s$ )

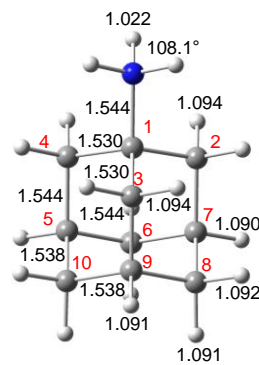

AmaH<sup>+</sup>(I) ( $C_{3v}$ )

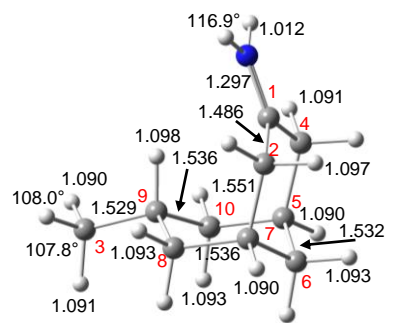

AmaH<sup>+</sup>(II) ( $C_s$ )

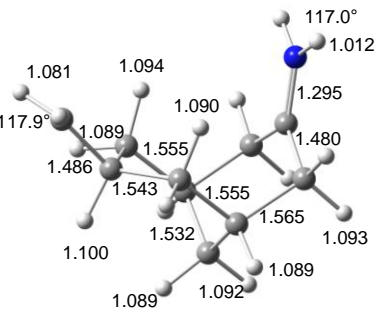

Ama<sup>+</sup>(II) ( $C_s$ )

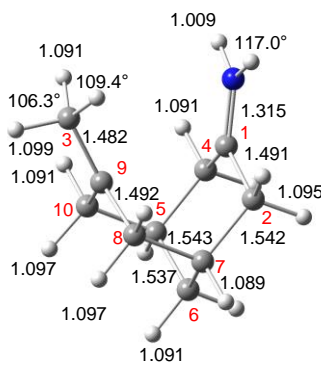

Ama<sup>+</sup>(III) ( $C_s$ )

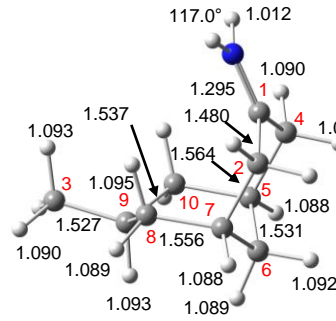

AmaH<sup>+</sup>(III) ( $C_s$ )

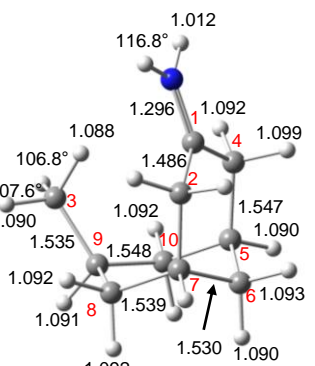

AmaH<sup>+</sup>(IV) ( $C_s$ )

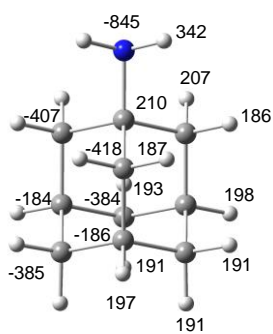

Ama ( $C_s$ )

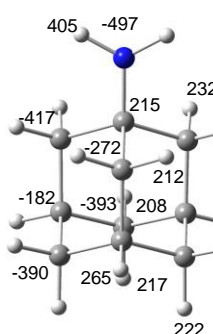

Ama<sup>+</sup>(I) ( $C_s$ )

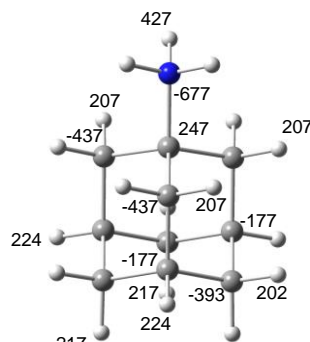

AmaH<sup>+</sup>(I) ( $C_{3v}$ )

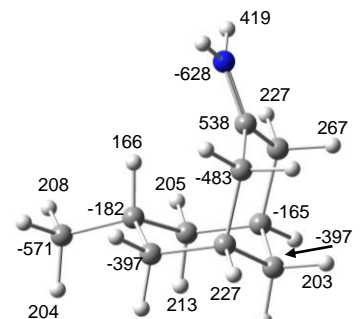

AmaH<sup>+</sup>(II) ( $C_s$ )

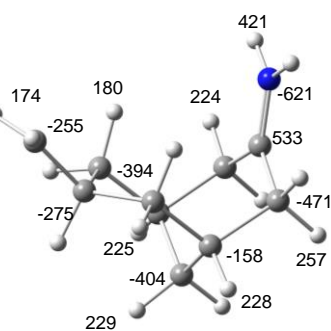

Ama<sup>+</sup>(II) ( $C_s$ )

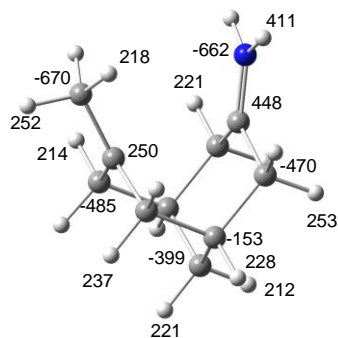

Ama<sup>+</sup>(III) ( $C_s$ )

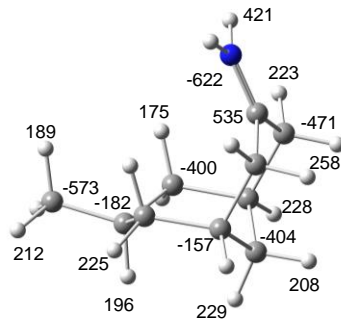

AmaH<sup>+</sup>(III) ( $C_s$ )

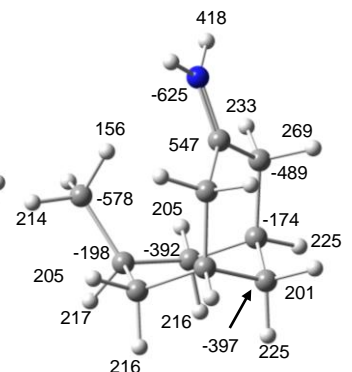

AmaH<sup>+</sup>(IV) ( $C_s$ )

Figure S4

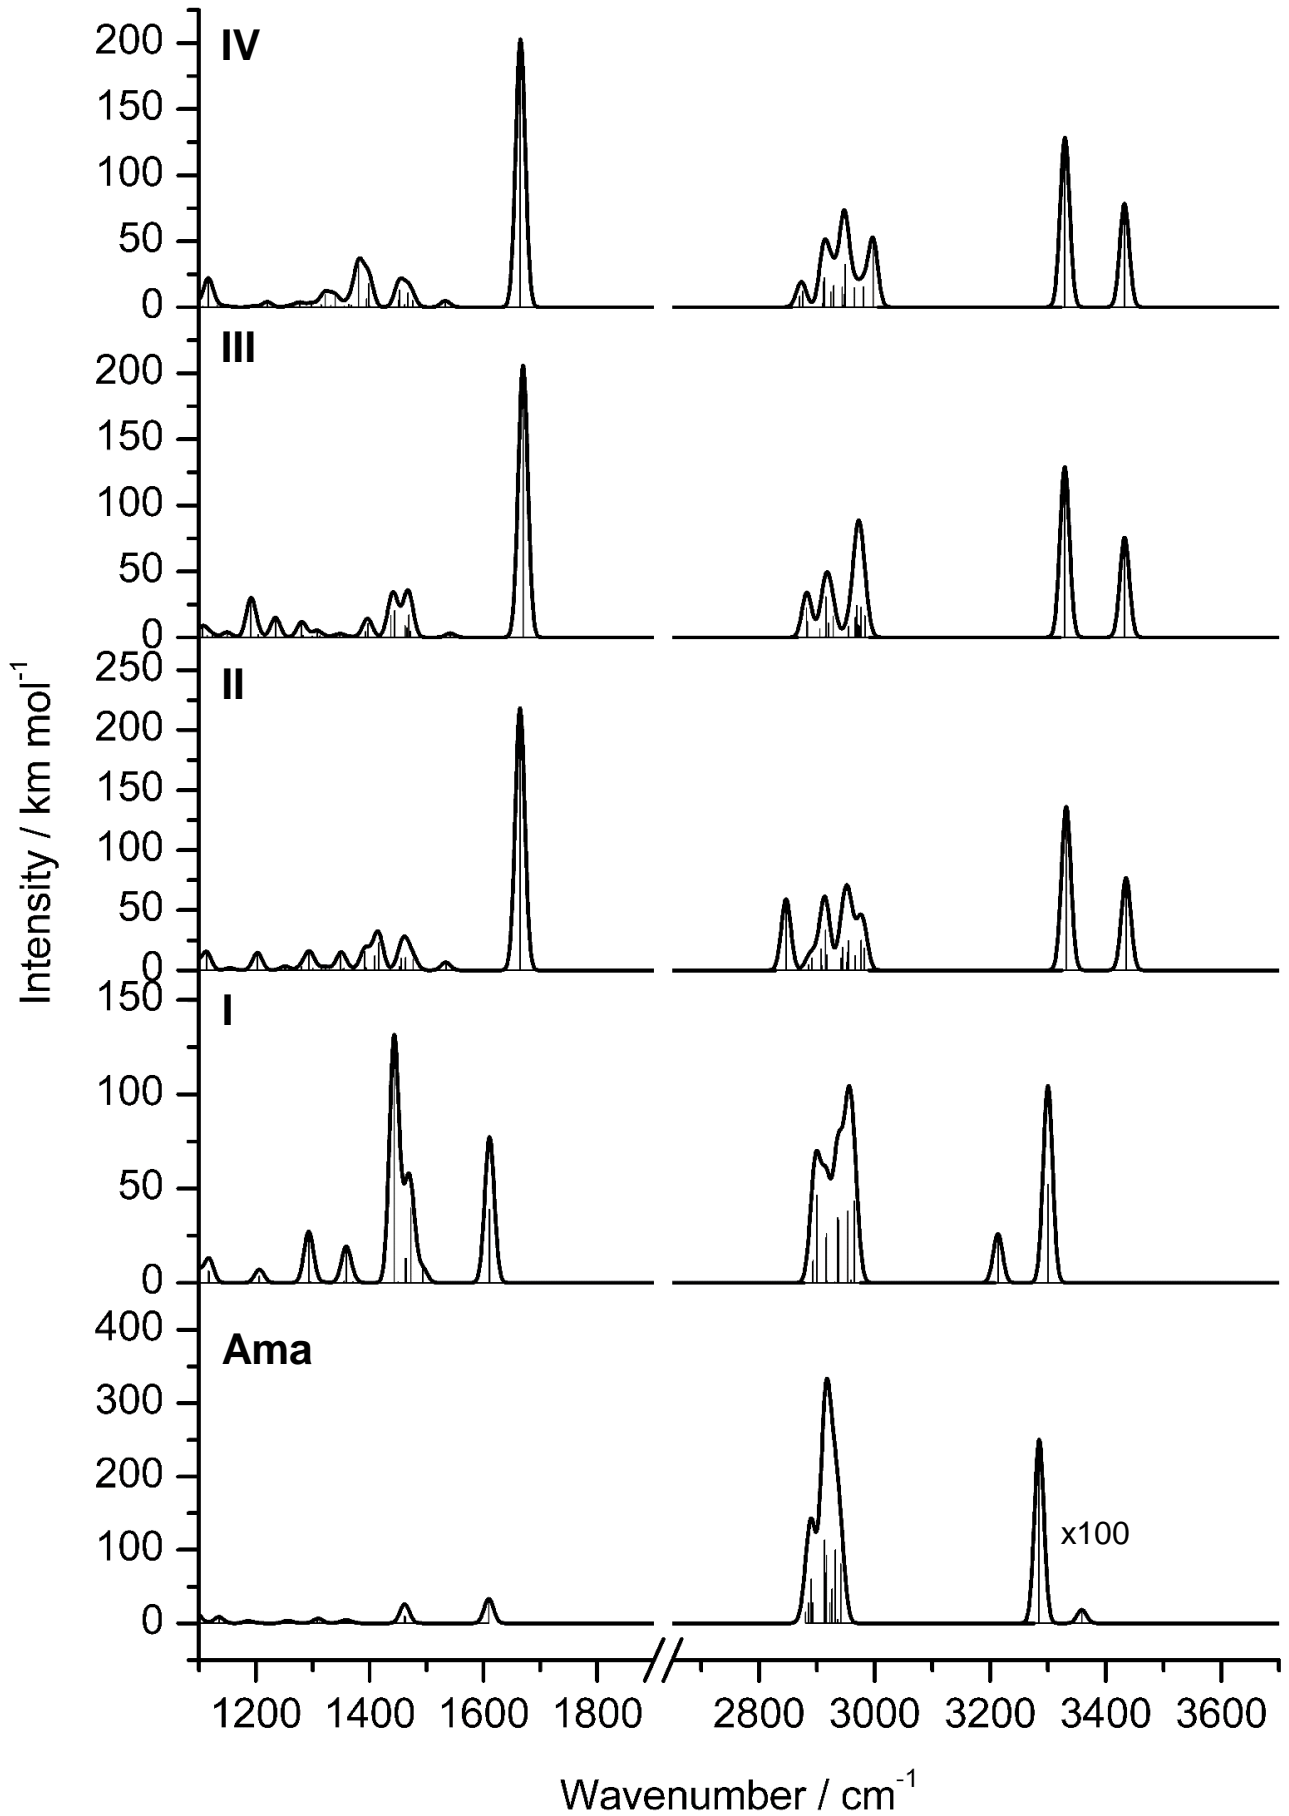

Figure S5

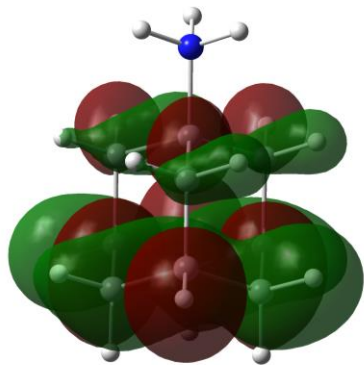

AmaH<sup>+</sup>(I) ( $C_{3v}$ )

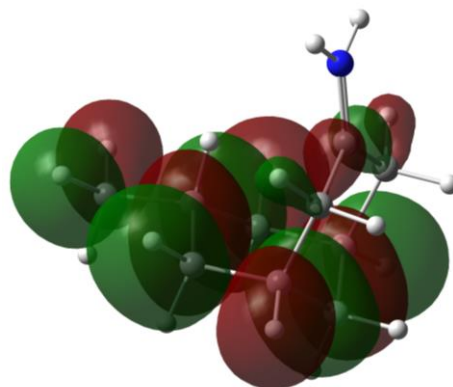

AmaH<sup>+</sup>(II) ( $C_s$ )

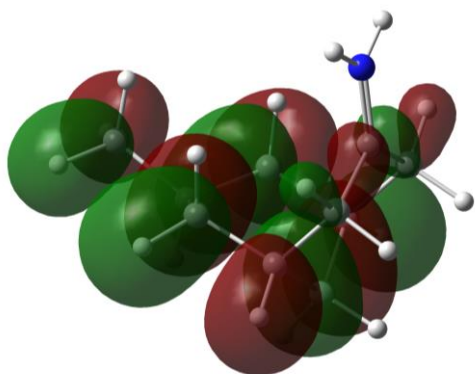

AmaH<sup>+</sup>(III) ( $C_s$ )

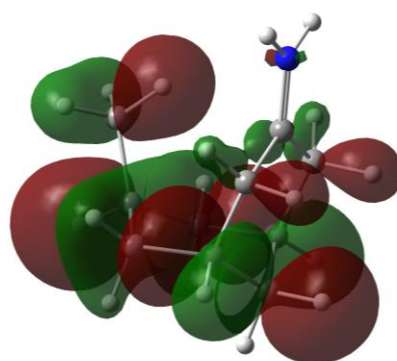

AmaH<sup>+</sup>(IV) ( $C_s$ )

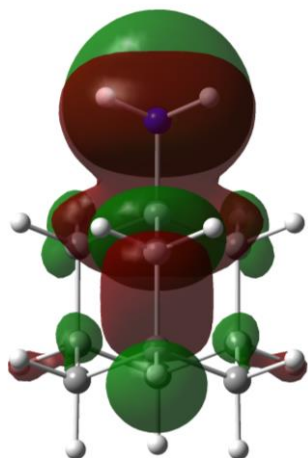

Ama ( $C_s$ )

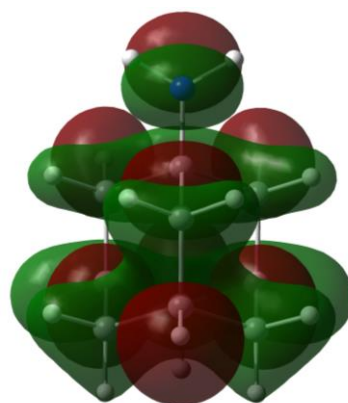

Ama<sup>+</sup>(I) ( $C_s$ )

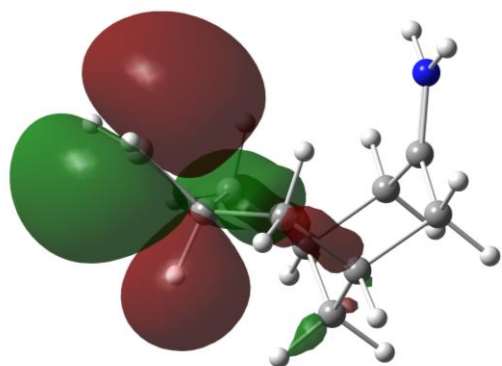

Ama<sup>+</sup>(II) ( $C_s$ )

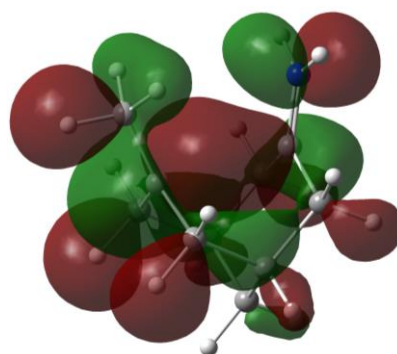

Ama<sup>+</sup>(III) ( $C_s$ )

Figure S6

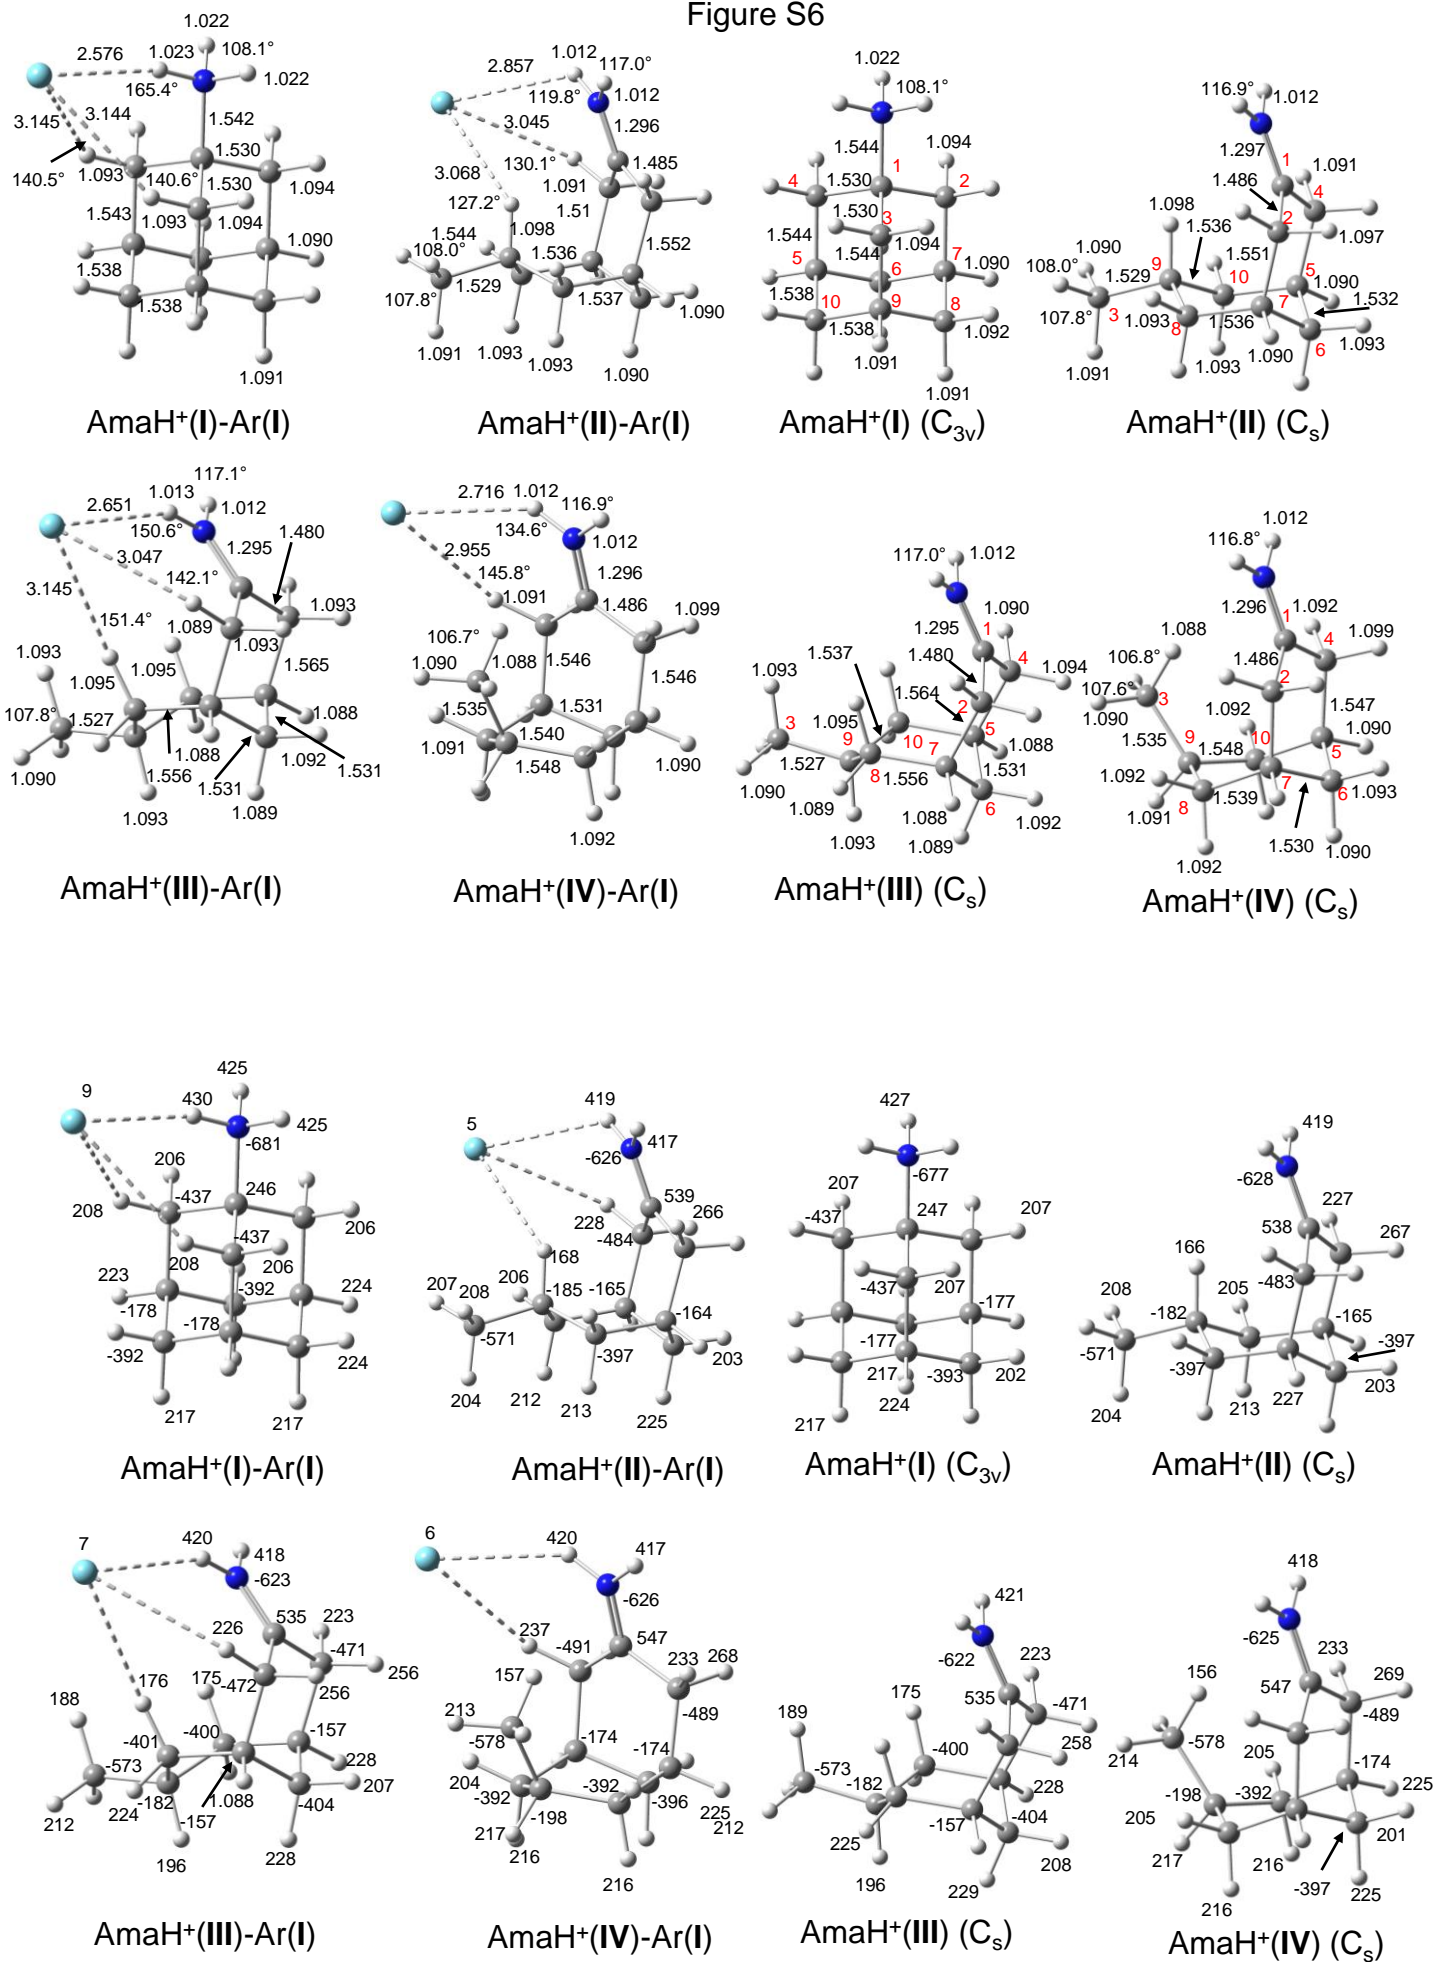

Figure S7

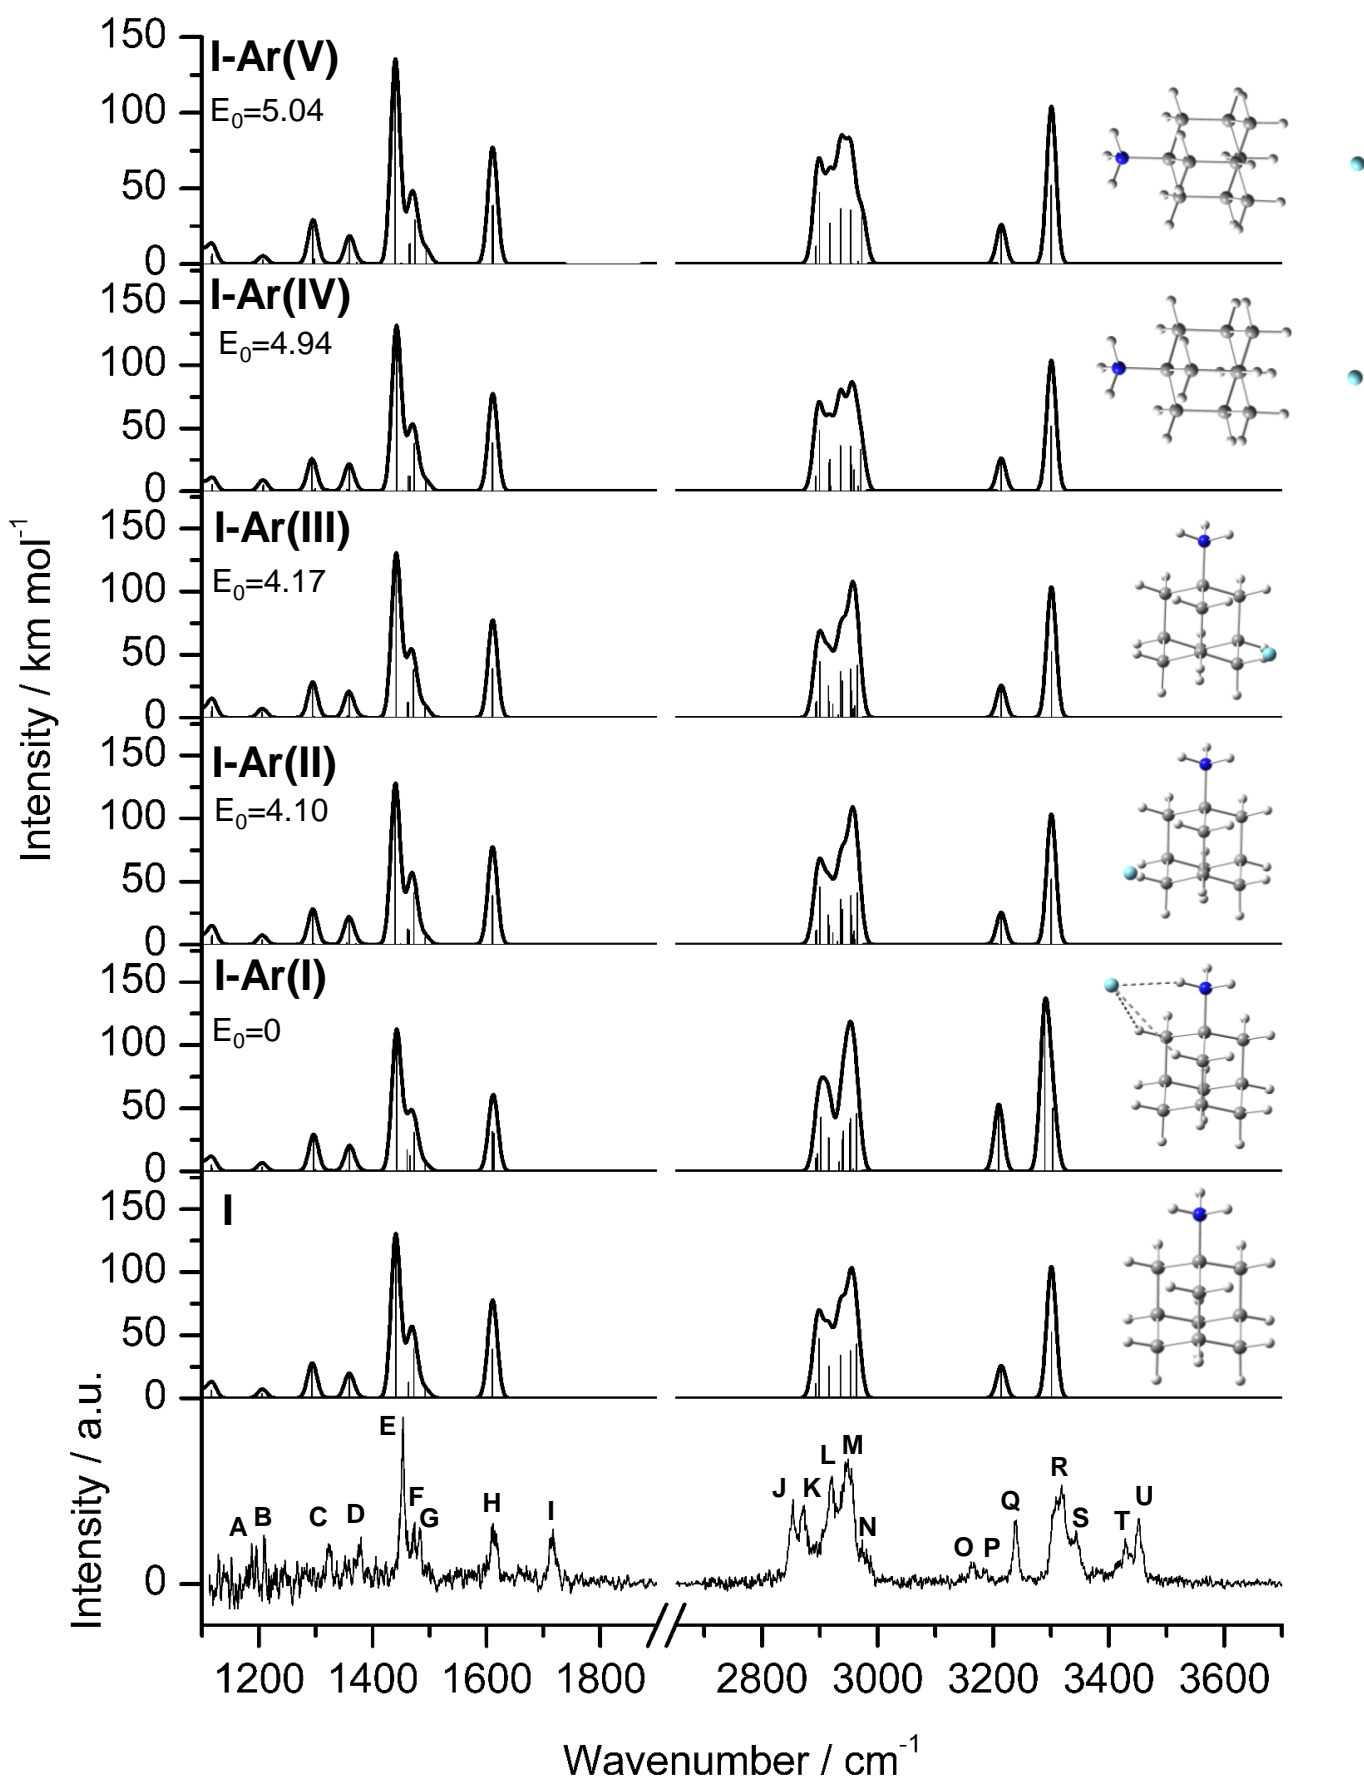



Figure S8

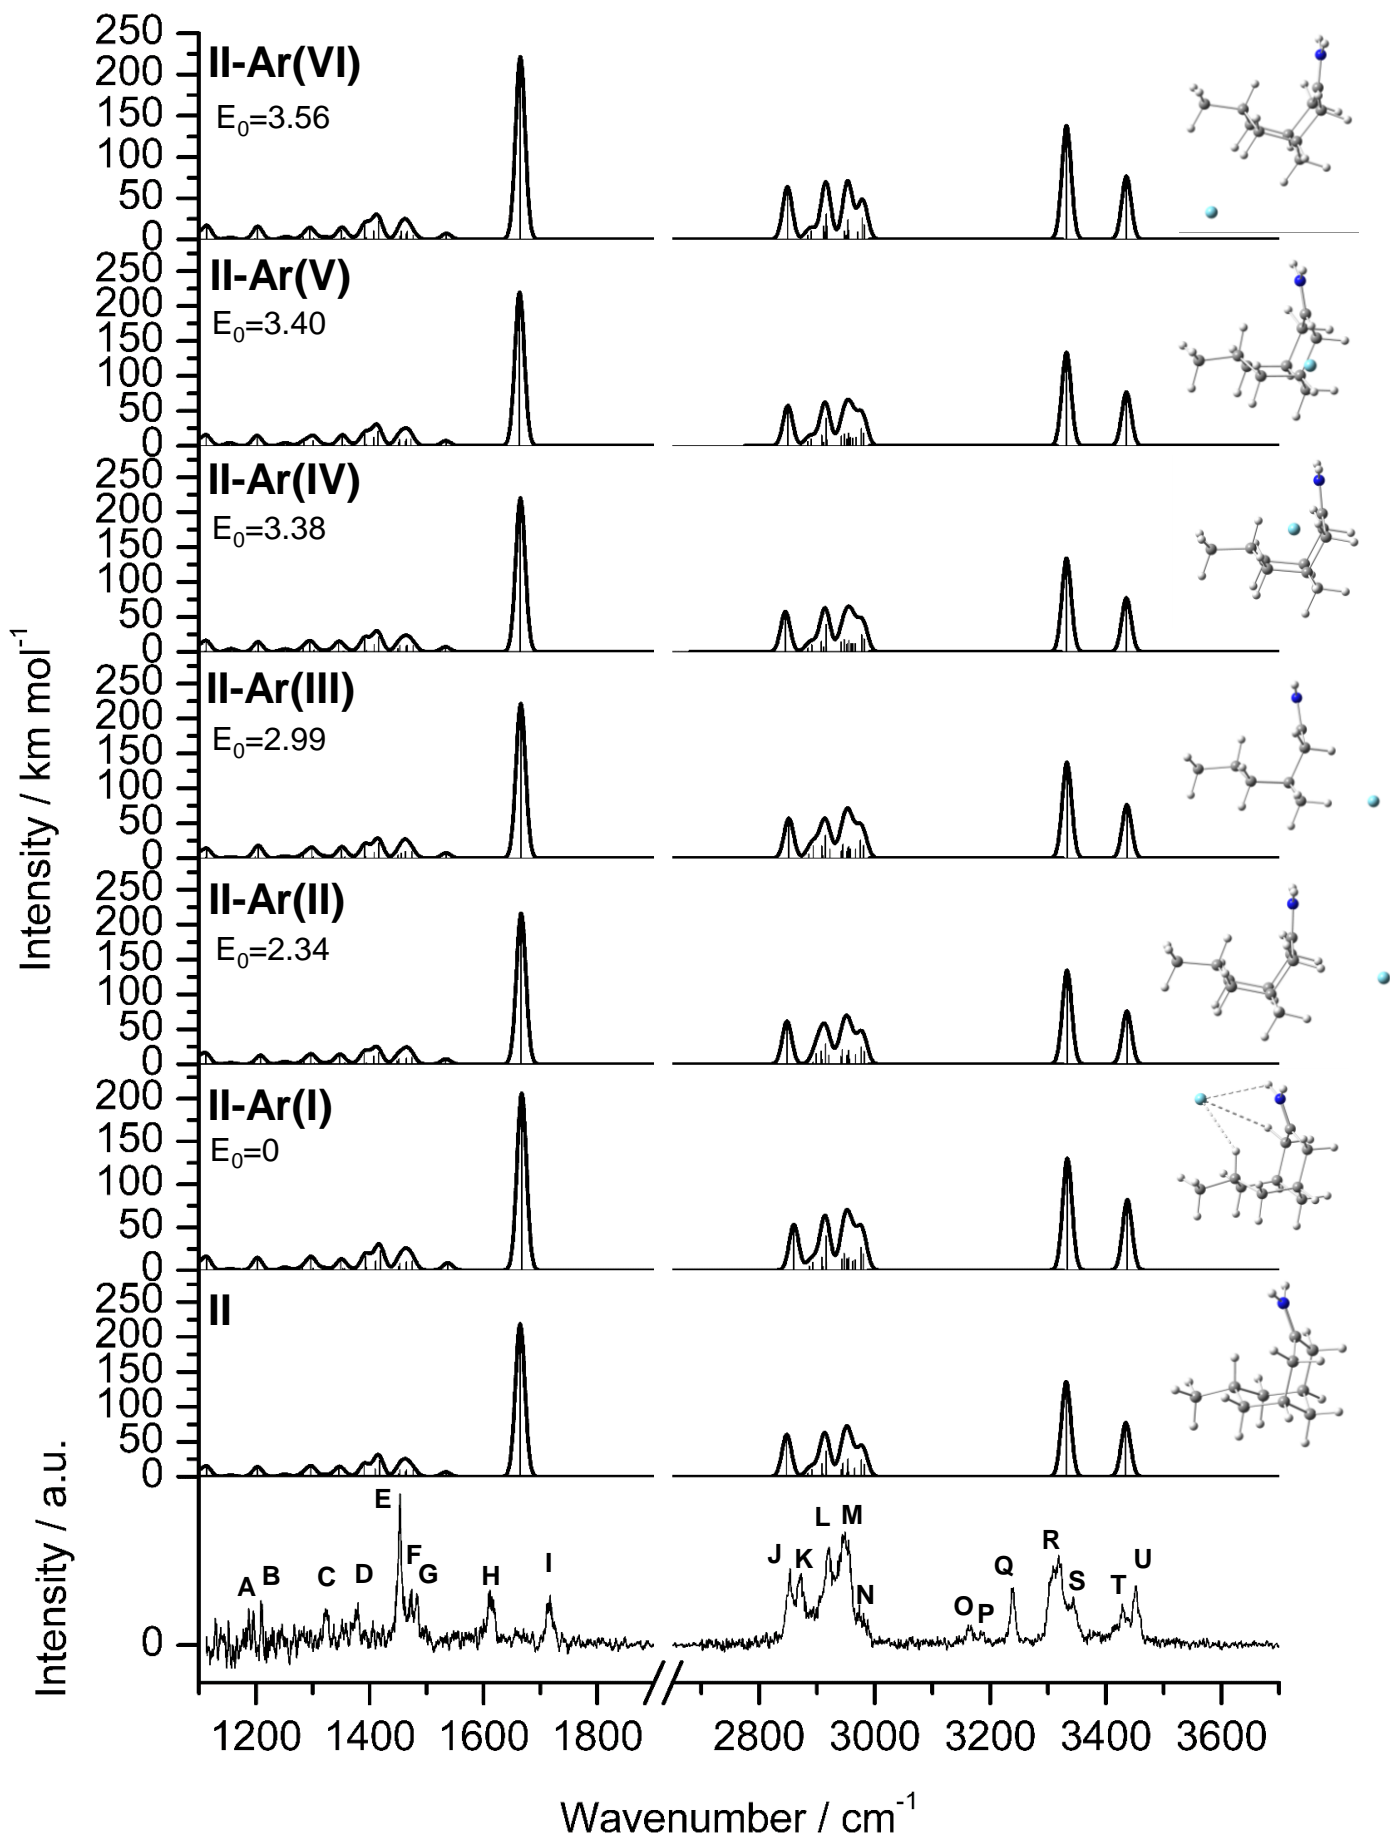

Figure S9

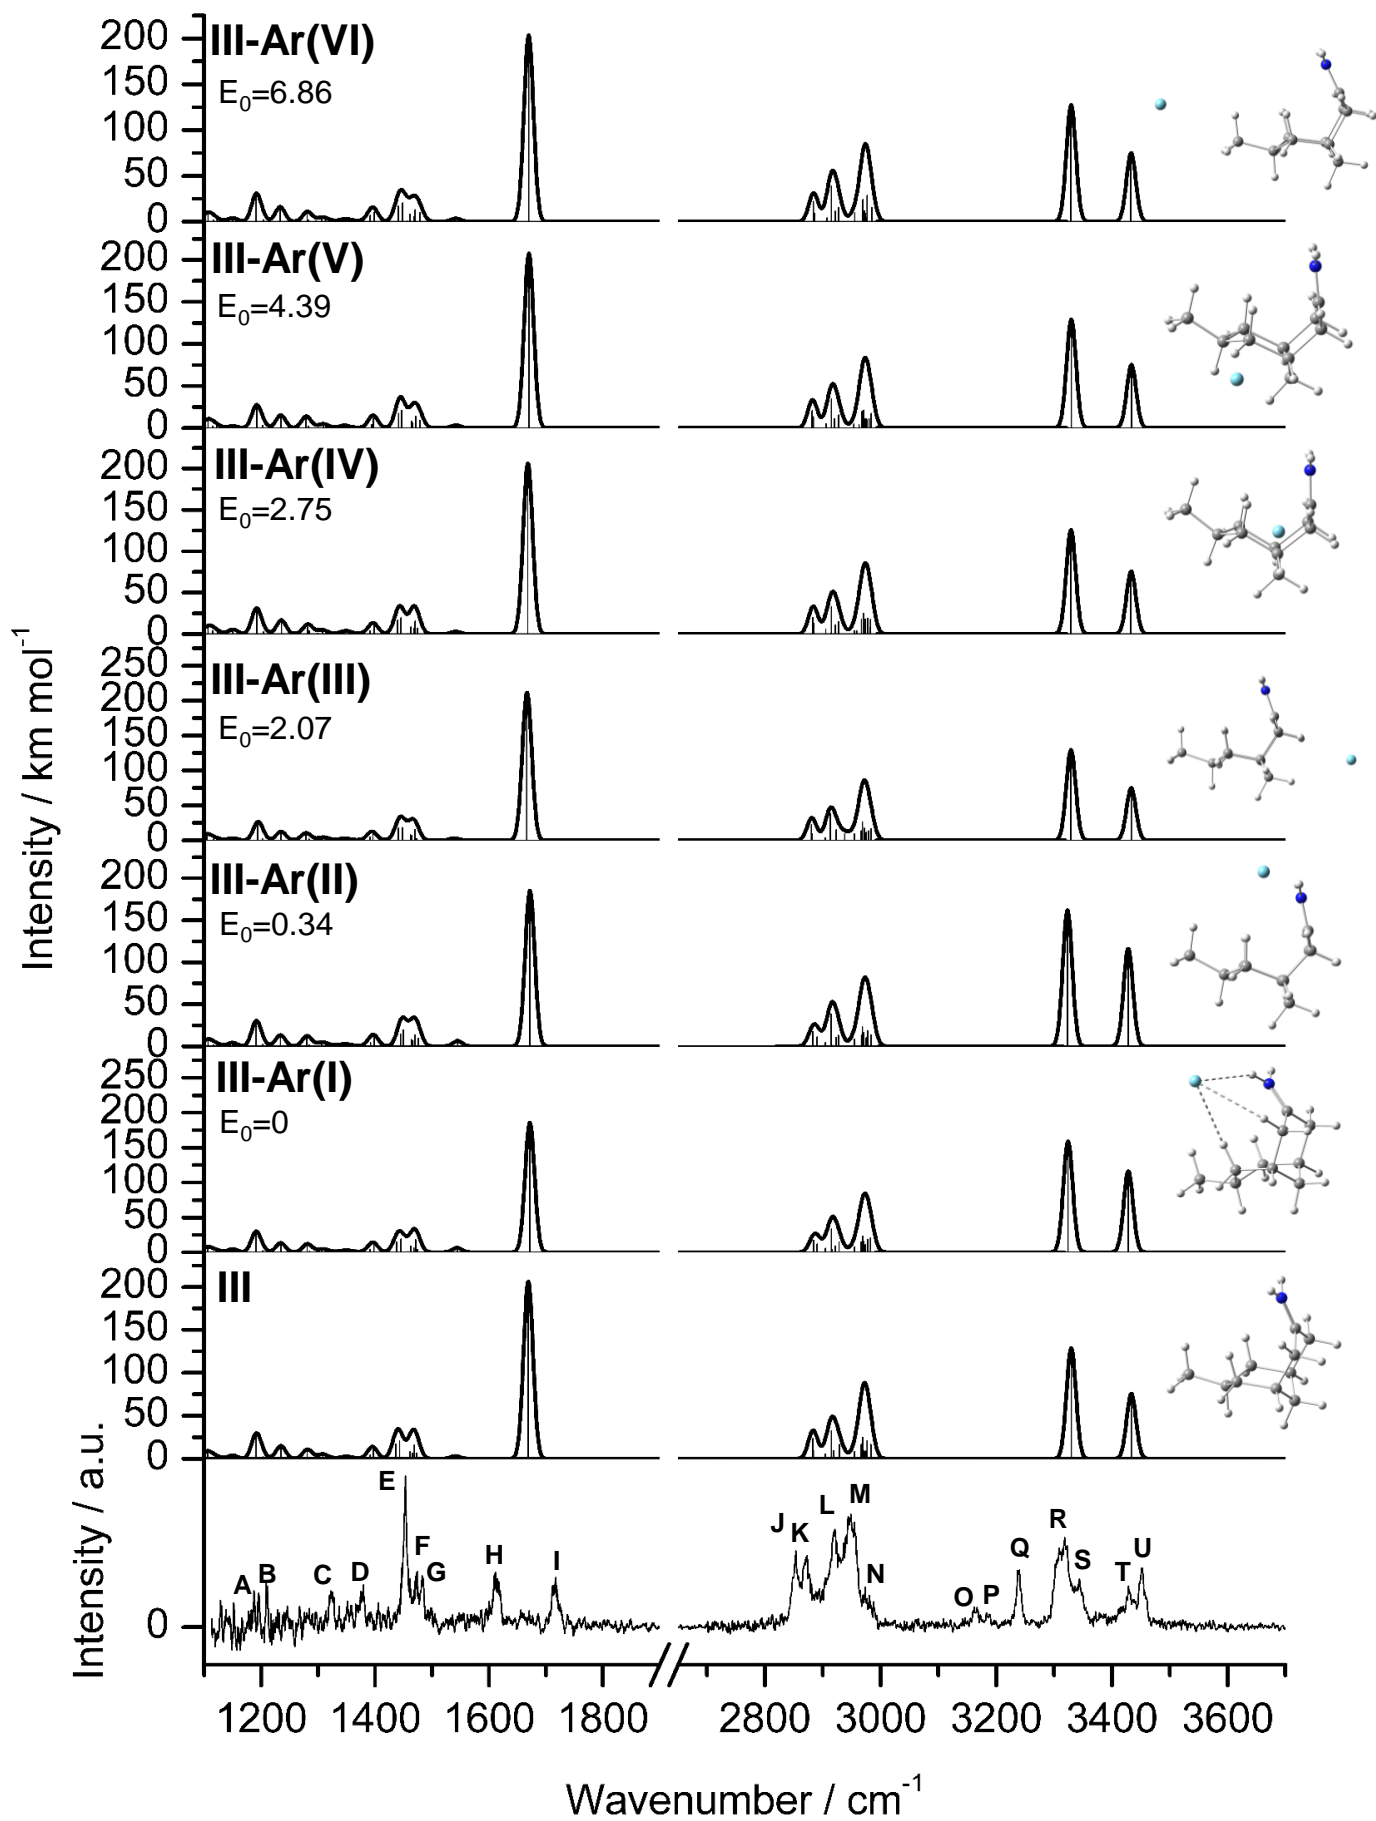

Figure S10

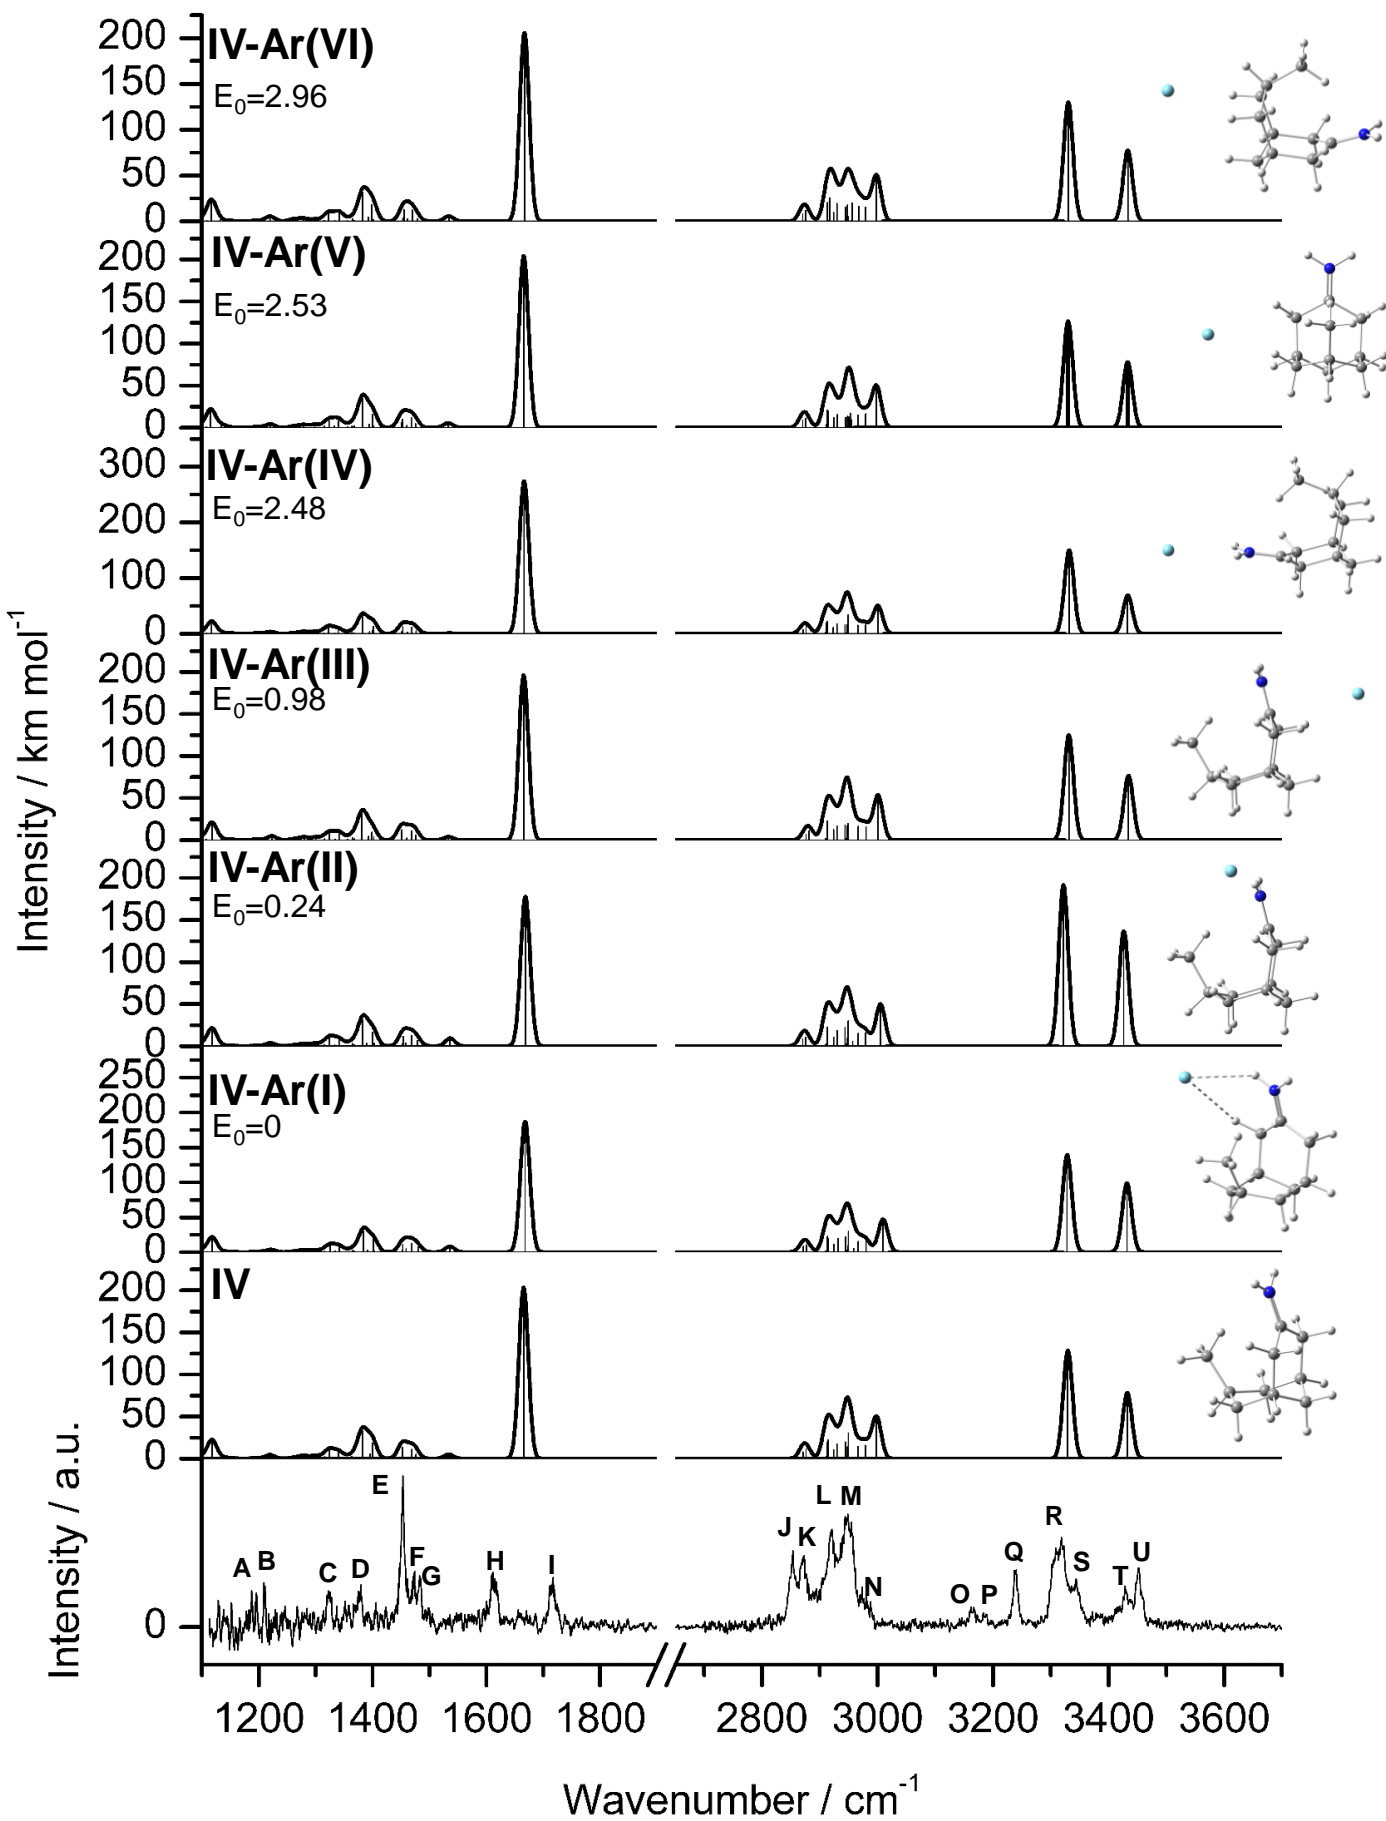



## Cartesian coordiantes (Å) and energies (hartree) of relevant structures (B3LYP-D3/cc-pVTZ)

### Ar

Sum of electronic and zero-point Energies= -527.559372  
Sum of electronic and thermal Energies= -527.557955  
Sum of electronic and thermal Enthalpies= -527.557011  
Sum of electronic and thermal Free Energies= -527.574583

### Ama

|    |   |   |           |           |           |
|----|---|---|-----------|-----------|-----------|
| 1  | 6 | 0 | -1.011128 | 1.127081  | 1.255703  |
| 2  | 1 | 0 | -0.514261 | 1.502017  | 2.154656  |
| 3  | 1 | 0 | -2.038105 | 1.501352  | 1.276200  |
| 4  | 6 | 0 | -1.011128 | -0.410783 | 1.256075  |
| 5  | 1 | 0 | -1.521728 | -0.777686 | 2.149414  |
| 6  | 6 | 0 | -0.287239 | 1.641427  | 0.000000  |
| 7  | 1 | 0 | -0.281288 | 2.733996  | 0.000000  |
| 8  | 6 | 0 | 1.158945  | 1.116612  | 0.000000  |
| 9  | 1 | 0 | 1.696050  | 1.483603  | 0.880296  |
| 10 | 1 | 0 | 1.696050  | 1.483603  | -0.880296 |
| 11 | 6 | 0 | 0.437377  | -0.927013 | 1.249983  |
| 12 | 1 | 0 | 0.460778  | -2.018647 | 1.262920  |
| 13 | 1 | 0 | 0.962767  | -0.582715 | 2.146909  |
| 14 | 6 | 0 | 1.182128  | -0.427579 | 0.000000  |
| 15 | 6 | 0 | 0.437377  | -0.927013 | -1.249983 |
| 16 | 1 | 0 | 0.962767  | -0.582715 | -2.146909 |
| 17 | 1 | 0 | 0.460778  | -2.018647 | -1.262920 |
| 18 | 6 | 0 | -1.736812 | -0.921403 | 0.000000  |
| 19 | 1 | 0 | -2.774040 | -0.575535 | 0.000000  |
| 20 | 1 | 0 | -1.762177 | -2.014271 | 0.000000  |
| 21 | 6 | 0 | -1.011128 | 1.127081  | -1.255703 |
| 22 | 1 | 0 | -2.038105 | 1.501352  | -1.276200 |
| 23 | 1 | 0 | -0.514261 | 1.502017  | -2.154656 |
| 24 | 6 | 0 | -1.011128 | -0.410783 | -1.256075 |
| 25 | 1 | 0 | -1.521728 | -0.777686 | -2.149414 |
| 26 | 7 | 0 | 2.535235  | -0.993222 | 0.000000  |
| 27 | 1 | 0 | 3.048130  | -0.666622 | -0.812633 |
| 28 | 1 | 0 | 3.048130  | -0.666622 | 0.812633  |

Sum of electronic and zero-point Energies= -445.999992  
Sum of electronic and thermal Energies= -445.991746  
Sum of electronic and thermal Enthalpies= -445.990802  
Sum of electronic and thermal Free Energies= -446.032017

### AmaH<sup>+</sup>(I)

|    |   |   |           |           |           |
|----|---|---|-----------|-----------|-----------|
| 1  | 7 | 0 | 0.000000  | 0.000000  | 2.705063  |
| 2  | 1 | 0 | 0.000000  | -0.955384 | 3.067886  |
| 3  | 1 | 0 | -0.827387 | 0.477692  | 3.067886  |
| 4  | 1 | 0 | 0.827387  | 0.477692  | 3.067886  |
| 5  | 6 | 0 | 0.000000  | 0.000000  | 1.161528  |
| 6  | 6 | 0 | 0.000000  | 1.454567  | 0.688278  |
| 7  | 1 | 0 | -0.884328 | 1.977269  | 1.063861  |
| 8  | 1 | 0 | 0.884328  | 1.977269  | 1.063861  |
| 9  | 6 | 0 | -1.259692 | -0.727284 | 0.688278  |
| 10 | 1 | 0 | -1.270201 | -1.754485 | 1.063861  |
| 11 | 1 | 0 | -2.154529 | -0.222784 | 1.063861  |
| 12 | 6 | 0 | 1.259692  | -0.727284 | 0.688278  |
| 13 | 1 | 0 | 2.154529  | -0.222784 | 1.063861  |
| 14 | 1 | 0 | 1.270201  | -1.754485 | 1.063861  |
| 15 | 6 | 0 | 0.000000  | 1.452026  | -0.855237 |
| 16 | 1 | 0 | 0.000000  | 2.485024  | -1.201872 |
| 17 | 6 | 0 | -1.257491 | -0.726013 | -0.855237 |
| 18 | 1 | 0 | -2.152094 | -1.242512 | -1.201872 |
| 19 | 6 | 0 | 1.257491  | -0.726013 | -0.855237 |
| 20 | 1 | 0 | 2.152094  | -1.242512 | -1.201872 |
| 21 | 6 | 0 | -1.258890 | 0.726821  | -1.359309 |
| 22 | 6 | 0 | 1.258890  | 0.726821  | -1.359309 |
| 23 | 6 | 0 | -0.000000 | -1.453641 | -1.359309 |
| 24 | 1 | 0 | -2.158547 | 1.246238  | -1.021366 |
| 25 | 1 | 0 | -1.278091 | 0.737906  | -2.449633 |
| 26 | 1 | 0 | 2.158547  | 1.246238  | -1.021366 |
| 27 | 1 | 0 | 1.278091  | 0.737906  | -2.449633 |
| 28 | 1 | 0 | -0.000000 | -2.492475 | -1.021366 |
| 29 | 1 | 0 | -0.000000 | -1.475813 | -2.449633 |

Sum of electronic and zero-point Energies= -446.364241  
Sum of electronic and thermal Energies= -446.355795

Sum of electronic and thermal Enthalpies= -446.354850  
Sum of electronic and thermal Free Energies= -446.395459

**AmaH\*(II)**

|    |   |   |           |           |           |
|----|---|---|-----------|-----------|-----------|
| 1  | 6 | 0 | -1.032218 | -0.080276 | 1.248536  |
| 2  | 6 | 0 | -1.920024 | -0.103457 | 0.000000  |
| 3  | 6 | 0 | -1.032218 | -0.080276 | -1.248536 |
| 4  | 6 | 0 | -0.174398 | 1.193527  | -1.268059 |
| 5  | 6 | 0 | 0.671935  | 1.384485  | 0.000000  |
| 6  | 6 | 0 | -0.174398 | 1.193527  | 1.268059  |
| 7  | 6 | 0 | -0.174398 | -1.372459 | 1.283463  |
| 8  | 6 | 0 | 1.378998  | 2.740017  | 0.000000  |
| 9  | 6 | 0 | 0.523455  | -1.643946 | 0.000000  |
| 10 | 6 | 0 | -0.174398 | -1.372459 | -1.283463 |
| 11 | 7 | 0 | 1.710185  | -2.166783 | 0.000000  |
| 12 | 1 | 0 | -1.651876 | -0.102280 | 2.144793  |
| 13 | 1 | 0 | -2.569775 | -0.981990 | 0.000000  |
| 14 | 1 | 0 | -2.571968 | 0.770259  | 0.000000  |
| 15 | 1 | 0 | -1.651876 | -0.102280 | -2.144793 |
| 16 | 1 | 0 | 0.471257  | 1.202982  | -2.149429 |
| 17 | 1 | 0 | -0.848000 | 2.047625  | -1.374939 |
| 18 | 1 | 0 | 0.648746  | 3.551113  | 0.000000  |
| 19 | 1 | 0 | 0.471257  | 1.202982  | 2.149429  |
| 20 | 1 | 0 | -0.848000 | 2.047625  | 1.374939  |
| 21 | 1 | 0 | 0.529042  | -1.376449 | 2.117771  |
| 22 | 1 | 0 | -0.851518 | -2.223682 | 1.429220  |
| 23 | 1 | 0 | 2.008692  | 2.857719  | -0.882285 |
| 24 | 1 | 0 | 2.008692  | 2.857719  | 0.882285  |
| 25 | 1 | 0 | 0.529042  | -1.376449 | -2.117771 |
| 26 | 1 | 0 | -0.851518 | -2.223682 | -1.429220 |
| 27 | 1 | 0 | 2.195815  | -2.378022 | 0.862392  |
| 28 | 1 | 0 | 2.195815  | -2.378022 | -0.862392 |
| 29 | 1 | 0 | 1.460851  | 0.620205  | 0.000000  |

Sum of electronic and zero-point Energies= -446.363086  
Sum of electronic and thermal Energies= -446.353254  
Sum of electronic and thermal Enthalpies= -446.352309  
Sum of electronic and thermal Free Energies= -446.397259

**AmaH\*(III)**

|    |   |   |           |           |           |
|----|---|---|-----------|-----------|-----------|
| 1  | 6 | 0 | 0.906969  | -0.296697 | 1.246490  |
| 2  | 6 | 0 | 1.667525  | -0.757854 | 0.000000  |
| 3  | 6 | 0 | 0.906969  | -0.296697 | -1.246490 |
| 4  | 6 | 0 | -0.539532 | -0.868885 | -1.270651 |
| 5  | 6 | 0 | -0.913395 | -1.649556 | 0.000000  |
| 6  | 6 | 0 | -0.539532 | -0.868885 | 1.270651  |
| 7  | 6 | 0 | 0.906969  | 1.267387  | 1.271436  |
| 8  | 6 | 0 | -2.392481 | -2.030142 | 0.000000  |
| 9  | 6 | 0 | 0.344785  | 1.775760  | 0.000000  |
| 10 | 6 | 0 | 0.906969  | 1.267387  | -1.271436 |
| 11 | 7 | 0 | -0.681722 | 2.565511  | 0.000000  |
| 12 | 1 | 0 | 1.442834  | -0.603444 | 2.142869  |
| 13 | 1 | 0 | 2.684396  | -0.359833 | 0.000000  |
| 14 | 1 | 0 | 1.764590  | -1.842406 | 0.000000  |
| 15 | 1 | 0 | 1.442834  | -0.603444 | -2.142869 |
| 16 | 1 | 0 | -1.265617 | -0.060210 | -1.407496 |
| 17 | 1 | 0 | -0.662583 | -1.517986 | -2.136895 |
| 18 | 1 | 0 | -0.335073 | -2.576938 | 0.000000  |
| 19 | 1 | 0 | -1.265617 | -0.060210 | 1.407496  |
| 20 | 1 | 0 | -0.662583 | -1.517986 | 2.136895  |
| 21 | 1 | 0 | 0.363962  | 1.650985  | 2.135132  |
| 22 | 1 | 0 | 1.942799  | 1.612172  | 1.337199  |
| 23 | 1 | 0 | -2.647755 | -2.619608 | -0.880911 |
| 24 | 1 | 0 | -2.647755 | -2.619608 | 0.880911  |
| 25 | 1 | 0 | 0.363962  | 1.650985  | -2.135132 |
| 26 | 1 | 0 | 1.942799  | 1.612172  | -1.337199 |
| 27 | 1 | 0 | -1.097319 | 2.892752  | 0.863023  |
| 28 | 1 | 0 | -1.097319 | 2.892752  | -0.863023 |
| 29 | 1 | 0 | -3.025964 | -1.139628 | 0.000000  |

Sum of electronic and zero-point Energies= -446.353807  
Sum of electronic and thermal Energies= -446.343818  
Sum of electronic and thermal Enthalpies= -446.342874  
Sum of electronic and thermal Free Energies= -446.388567

**AmaH<sup>+</sup>(IV)**

|    |   |   |           |           |           |
|----|---|---|-----------|-----------|-----------|
| 1  | 6 | 0 | -0.573444 | -1.316962 | 1.284082  |
| 2  | 1 | 0 | -1.137686 | -0.941170 | 2.140379  |
| 3  | 1 | 0 | -0.401991 | -2.376871 | 1.482034  |
| 4  | 6 | 0 | 0.821153  | -0.667853 | 1.243741  |
| 5  | 1 | 0 | 1.355380  | -0.986435 | 2.139060  |
| 6  | 6 | 0 | -1.428799 | -1.193903 | 0.000000  |
| 7  | 1 | 0 | -2.092472 | -2.060100 | 0.000000  |
| 8  | 6 | 0 | -2.371882 | 0.017165  | 0.000000  |
| 9  | 1 | 0 | -3.015790 | -0.001197 | 0.879919  |
| 10 | 1 | 0 | -1.865043 | 0.980393  | 0.000000  |
| 11 | 6 | 0 | 0.821153  | 0.878044  | 1.290438  |
| 12 | 1 | 0 | 1.846003  | 1.204899  | 1.515446  |
| 13 | 1 | 0 | 0.189284  | 1.270896  | 2.089518  |
| 14 | 6 | 0 | 0.497875  | 1.540261  | 0.000000  |
| 15 | 6 | 0 | 0.821153  | 0.878044  | -1.290438 |
| 16 | 1 | 0 | 0.189284  | 1.270896  | -2.089518 |
| 17 | 1 | 0 | 1.846003  | 1.204899  | -1.515446 |
| 18 | 6 | 0 | 1.584049  | -1.129779 | 0.000000  |
| 19 | 1 | 0 | 1.662105  | -2.216994 | 0.000000  |
| 20 | 1 | 0 | 2.605267  | -0.739745 | 0.000000  |
| 21 | 6 | 0 | -0.573444 | -1.316962 | -1.284082 |
| 22 | 1 | 0 | -0.401991 | -2.376871 | -1.482034 |
| 23 | 1 | 0 | -1.137686 | -0.941170 | -2.140379 |
| 24 | 6 | 0 | 0.821153  | -0.667853 | -1.243741 |
| 25 | 1 | 0 | 1.355380  | -0.986435 | -2.139060 |
| 26 | 7 | 0 | -0.007701 | 2.733743  | 0.000000  |
| 27 | 1 | 0 | -0.220072 | 3.219394  | -0.862291 |
| 28 | 1 | 0 | -0.220072 | 3.219394  | 0.862291  |
| 29 | 1 | 0 | -3.015790 | -0.001197 | -0.879919 |

Sum of electronic and zero-point Energies= -446.353004  
Sum of electronic and thermal Energies= -446.342963  
Sum of electronic and thermal Enthalpies= -446.342018  
Sum of electronic and thermal Free Energies= -446.387553

**Ama<sup>+</sup>(I)**

|    |   |   |           |           |           |
|----|---|---|-----------|-----------|-----------|
| 1  | 6 | 0 | -1.009933 | 1.119927  | 1.260815  |
| 2  | 1 | 0 | -0.519111 | 1.502470  | 2.157785  |
| 3  | 1 | 0 | -2.034331 | 1.491912  | 1.270028  |
| 4  | 6 | 0 | -1.009933 | -0.418569 | 1.258258  |
| 5  | 1 | 0 | -1.512657 | -0.782974 | 2.154281  |
| 6  | 6 | 0 | -0.292961 | 1.610622  | 0.000000  |
| 7  | 1 | 0 | -0.245778 | 2.709641  | 0.000000  |
| 8  | 6 | 0 | 1.169160  | 1.189049  | 0.000000  |
| 9  | 1 | 0 | 1.708022  | 1.497285  | 0.892533  |
| 10 | 1 | 0 | 1.708022  | 1.497285  | -0.892533 |
| 11 | 6 | 0 | 0.436294  | -0.931980 | 1.280099  |
| 12 | 1 | 0 | 0.450942  | -2.023690 | 1.314481  |
| 13 | 1 | 0 | 0.966411  | -0.567549 | 2.163360  |
| 14 | 6 | 0 | 1.172297  | -0.507942 | 0.000000  |
| 15 | 6 | 0 | 0.436294  | -0.931980 | -1.280099 |
| 16 | 1 | 0 | 0.966411  | -0.567549 | -2.163360 |
| 17 | 1 | 0 | 0.450942  | -2.023690 | -1.314481 |
| 18 | 6 | 0 | -1.725250 | -0.938846 | 0.000000  |
| 19 | 1 | 0 | -2.762343 | -0.601654 | 0.000000  |
| 20 | 1 | 0 | -1.747492 | -2.030538 | 0.000000  |
| 21 | 6 | 0 | -1.009933 | 1.119927  | -1.260815 |
| 22 | 1 | 0 | -2.034331 | 1.491912  | -1.270028 |
| 23 | 1 | 0 | -0.519111 | 1.502470  | -2.157785 |
| 24 | 6 | 0 | -1.009933 | -0.418569 | -1.258258 |
| 25 | 1 | 0 | -1.512657 | -0.782974 | -2.154281 |
| 26 | 7 | 0 | 2.515855  | -0.841720 | 0.000000  |
| 27 | 1 | 0 | 3.044730  | -0.885075 | -0.862169 |
| 28 | 1 | 0 | 3.044730  | -0.885075 | 0.862169  |

Sum of electronic and zero-point Energies= -445.710234  
Sum of electronic and thermal Energies= -445.701526  
Sum of electronic and thermal Enthalpies= -445.700582  
Sum of electronic and thermal Free Energies= -445.743151

**Ama<sup>+</sup>(II)**

|    |   |   |           |           |           |
|----|---|---|-----------|-----------|-----------|
| 1  | 6 | 0 | 0.878102  | -0.318597 | 1.247668  |
| 2  | 6 | 0 | 1.635327  | -0.783226 | 0.000000  |
| 3  | 6 | 0 | 0.878102  | -0.318597 | -1.247668 |
| 4  | 6 | 0 | -0.568901 | -0.886083 | -1.279077 |
| 5  | 6 | 0 | -0.955442 | -1.657448 | 0.000000  |
| 6  | 6 | 0 | -0.568901 | -0.886083 | 1.279077  |
| 7  | 6 | 0 | 0.878102  | 1.245884  | 1.270499  |
| 8  | 6 | 0 | -2.392771 | -2.036083 | 0.000000  |
| 9  | 6 | 0 | 0.309242  | 1.748203  | 0.000000  |
| 10 | 6 | 0 | 0.878102  | 1.245884  | -1.270499 |
| 11 | 7 | 0 | -0.730363 | 2.520450  | 0.000000  |
| 12 | 1 | 0 | 1.416275  | -0.624513 | 2.143007  |
| 13 | 1 | 0 | 2.653570  | -0.389067 | 0.000000  |
| 14 | 1 | 0 | 1.727499  | -1.868303 | 0.000000  |
| 15 | 1 | 0 | 1.416275  | -0.624513 | -2.143007 |
| 16 | 1 | 0 | -1.294078 | -0.080902 | -1.429269 |
| 17 | 1 | 0 | -0.686147 | -1.547069 | -2.136958 |
| 18 | 1 | 0 | -0.364623 | -2.585563 | 0.000000  |
| 19 | 1 | 0 | -1.294078 | -0.080902 | 1.429269  |
| 20 | 1 | 0 | -0.686147 | -1.547069 | 2.136958  |
| 21 | 1 | 0 | 0.337490  | 1.629612  | 2.135471  |
| 22 | 1 | 0 | 1.913834  | 1.590934  | 1.332043  |
| 23 | 1 | 0 | -2.899004 | -2.268577 | -0.926112 |
| 24 | 1 | 0 | -2.899004 | -2.268577 | 0.926112  |
| 25 | 1 | 0 | 0.337490  | 1.629612  | -2.135471 |
| 26 | 1 | 0 | 1.913834  | 1.590934  | -1.332043 |
| 27 | 1 | 0 | -1.153201 | 2.838847  | 0.862911  |
| 28 | 1 | 0 | -1.153201 | 2.838847  | -0.862911 |

Sum of electronic and zero-point Energies= -445.694426  
Sum of electronic and thermal Energies= -445.684131  
Sum of electronic and thermal Enthalpies= -445.683187  
Sum of electronic and thermal Free Energies= -445.730175

**Ama<sup>+</sup>(III)**

|    |   |   |           |           |           |
|----|---|---|-----------|-----------|-----------|
| 1  | 6 | 0 | 0.923219  | -0.687401 | 1.262057  |
| 2  | 6 | 0 | 1.637589  | -1.195743 | 0.000000  |
| 3  | 6 | 0 | 0.923219  | -0.687401 | -1.262057 |
| 4  | 6 | 0 | -0.547317 | -1.154933 | -1.263904 |
| 5  | 6 | 0 | -1.207910 | -0.715660 | 0.000000  |
| 6  | 6 | 0 | -0.547317 | -1.154933 | 1.263904  |
| 7  | 6 | 0 | 0.923219  | 0.854630  | 1.276496  |
| 8  | 6 | 0 | -2.594709 | -0.193357 | 0.000000  |
| 9  | 6 | 0 | 0.358830  | 1.379799  | 0.000000  |
| 10 | 6 | 0 | 0.923219  | 0.854630  | -1.276496 |
| 11 | 7 | 0 | -0.415579 | 2.442147  | 0.000000  |
| 12 | 1 | 0 | 1.432506  | -1.047956 | 2.154616  |
| 13 | 1 | 0 | 2.679262  | -0.869158 | 0.000000  |
| 14 | 1 | 0 | 1.650442  | -2.286200 | 0.000000  |
| 15 | 1 | 0 | 1.432506  | -1.047956 | -2.154616 |
| 16 | 1 | 0 | -1.072493 | -0.775868 | -2.141394 |
| 17 | 1 | 0 | -0.569959 | -2.249855 | -1.329234 |
| 18 | 1 | 0 | -1.072493 | -0.775868 | 2.141394  |
| 19 | 1 | 0 | -0.569959 | -2.249855 | 1.329234  |
| 20 | 1 | 0 | 0.380399  | 1.243863  | 2.139094  |
| 21 | 1 | 0 | 1.953469  | 1.219584  | 1.347374  |
| 22 | 1 | 0 | 0.380399  | 1.243863  | -2.139094 |
| 23 | 1 | 0 | 1.953469  | 1.219584  | -1.347374 |
| 24 | 1 | 0 | -0.742050 | 2.856458  | 0.860499  |
| 25 | 1 | 0 | -0.742050 | 2.856458  | -0.860499 |
| 26 | 1 | 0 | -2.812381 | 0.398211  | -0.890584 |
| 27 | 1 | 0 | -2.812381 | 0.398211  | 0.890584  |
| 28 | 1 | 0 | -3.311898 | -1.026340 | 0.000000  |

Sum of electronic and zero-point Energies= -445.727708  
Sum of electronic and thermal Energies= -445.717586  
Sum of electronic and thermal Enthalpies= -445.716642  
Sum of electronic and thermal Free Energies= -445.762902

**AmaH<sup>+</sup>(I)-Ar(I)**

|    |    |   |           |           |           |
|----|----|---|-----------|-----------|-----------|
| 1  | 6  | 0 | -2.647295 | 0.362184  | -1.289414 |
| 2  | 1  | 0 | -2.655463 | 1.109472  | -2.086291 |
| 3  | 1  | 0 | -3.541061 | -0.249047 | -1.420106 |
| 4  | 6  | 0 | -2.682966 | 1.046241  | 0.087306  |
| 5  | 1  | 0 | -3.564609 | 1.681739  | 0.165642  |
| 6  | 6  | 0 | -1.393736 | -0.521170 | -1.398032 |
| 7  | 1  | 0 | -1.358289 | -1.000844 | -2.375801 |
| 8  | 6  | 0 | -0.136391 | 0.358792  | -1.239284 |
| 9  | 1  | 0 | -0.105183 | 1.116008  | -2.028138 |
| 10 | 1  | 0 | 0.765582  | -0.252515 | -1.325510 |
| 11 | 6  | 0 | -1.427348 | 1.929262  | 0.247616  |
| 12 | 1  | 0 | -1.442794 | 2.433084  | 1.218222  |
| 13 | 1  | 0 | -1.406576 | 2.697574  | -0.530493 |
| 14 | 6  | 0 | -0.197537 | 1.026817  | 0.135660  |
| 15 | 6  | 0 | -0.188604 | -0.021373 | 1.250780  |
| 16 | 1  | 0 | 0.712961  | -0.636004 | 1.187981  |
| 17 | 1  | 0 | -0.195542 | 0.466316  | 2.229923  |
| 18 | 6  | 0 | -2.698548 | -0.017690 | 1.197951  |
| 19 | 1  | 0 | -3.593361 | -0.634104 | 1.104535  |
| 20 | 1  | 0 | -2.742766 | 0.458463  | 2.180203  |
| 21 | 6  | 0 | -1.407079 | -1.586956 | -0.288876 |
| 22 | 1  | 0 | -2.281389 | -2.228363 | -0.404698 |
| 23 | 1  | 0 | -0.527957 | -2.230534 | -0.368335 |
| 24 | 6  | 0 | -1.445274 | -0.900886 | 1.086850  |
| 25 | 1  | 0 | -1.446645 | -1.650337 | 1.877873  |
| 26 | 7  | 0 | 1.059263  | 1.905471  | 0.295294  |
| 27 | 1  | 0 | 1.907579  | 1.337440  | 0.232027  |
| 28 | 1  | 0 | 1.097636  | 2.618351  | -0.435570 |
| 29 | 1  | 0 | 1.058797  | 2.378268  | 1.200955  |
| 30 | 18 | 0 | 3.611771  | -0.576660 | -0.030223 |

Sum of electronic and zero-point Energies= -973.927480  
Sum of electronic and thermal Energies= -973.916548  
Sum of electronic and thermal Enthalpies= -973.915604  
Sum of electronic and thermal Free Energies= -973.965796

**AmaH<sup>+</sup>(II)-Ar(I)**

|    |    |   |           |           |           |
|----|----|---|-----------|-----------|-----------|
| 1  | 6  | 0 | -2.255515 | 0.101817  | -0.504154 |
| 2  | 6  | 0 | -2.311848 | 0.163062  | 1.026147  |
| 3  | 6  | 0 | -0.885086 | 0.122000  | 1.583156  |
| 4  | 6  | 0 | -0.188743 | -1.181086 | 1.163576  |
| 5  | 6  | 0 | -0.178381 | -1.407516 | -0.355328 |
| 6  | 6  | 0 | -1.575128 | -1.198566 | -0.959448 |
| 7  | 6  | 0 | -1.530646 | 1.368436  | -1.032993 |
| 8  | 6  | 0 | 0.382927  | -2.784868 | -0.709920 |
| 9  | 6  | 0 | -0.231057 | 1.613824  | -0.356963 |
| 10 | 6  | 0 | -0.115481 | 1.381753  | 1.105893  |
| 11 | 7  | 0 | 0.777935  | 2.074866  | -1.027428 |
| 12 | 1  | 0 | -3.264496 | 0.135243  | -0.914637 |
| 13 | 1  | 0 | -2.835056 | 1.061976  | 1.360861  |
| 14 | 1  | 0 | -2.875519 | -0.689653 | 1.404915  |
| 15 | 1  | 0 | -0.909739 | 0.174553  | 2.671431  |
| 16 | 1  | 0 | 0.832743  | -1.206941 | 1.548745  |
| 17 | 1  | 0 | -0.716593 | -2.010573 | 1.640960  |
| 18 | 1  | 0 | -0.244278 | -3.573448 | -0.290693 |
| 19 | 1  | 0 | -1.516590 | -1.234567 | -2.049886 |
| 20 | 1  | 0 | -2.217090 | -2.031494 | -0.661305 |
| 21 | 1  | 0 | -1.409329 | 1.349059  | -2.117288 |
| 22 | 1  | 0 | -2.153892 | 2.238873  | -0.793081 |
| 23 | 1  | 0 | 1.390769  | -2.914332 | -0.314160 |
| 24 | 1  | 0 | 0.423867  | -2.929399 | -1.789920 |
| 25 | 1  | 0 | 0.930048  | 1.366105  | 1.415830  |
| 26 | 1  | 0 | -0.578104 | 2.259538  | 1.574322  |
| 27 | 1  | 0 | 0.714959  | 2.254748  | -2.021144 |
| 28 | 1  | 0 | 1.673310  | 2.241545  | -0.586418 |
| 29 | 1  | 0 | 0.502004  | -0.671995 | -0.803623 |
| 30 | 18 | 0 | 3.341178  | 0.032420  | 0.119849  |

Sum of electronic and zero-point Energies= -973.926176  
Sum of electronic and thermal Energies= -973.913831  
Sum of electronic and thermal Enthalpies= -973.912887  
Sum of electronic and thermal Free Energies= -973.966243

**AmaH<sup>+</sup>(III)-Ar(I)**

|    |    |   |           |           |           |
|----|----|---|-----------|-----------|-----------|
| 1  | 6  | 0 | -0.590637 | -0.252460 | 1.537625  |
| 2  | 6  | 0 | -2.038611 | -0.636345 | 1.219681  |
| 3  | 6  | 0 | -2.217208 | -0.689673 | -0.300410 |
| 4  | 6  | 0 | -1.880903 | 0.679274  | -0.957491 |
| 5  | 6  | 0 | -1.329093 | 1.719770  | 0.031317  |
| 6  | 6  | 0 | -0.222223 | 1.126796  | 0.919154  |
| 7  | 6  | 0 | 0.348115  | -1.387374 | 1.009212  |
| 8  | 6  | 0 | -0.841869 | 2.970132  | -0.697682 |
| 9  | 6  | 0 | 0.084942  | -1.600045 | -0.431649 |
| 10 | 6  | 0 | -1.311258 | -1.835479 | -0.862394 |
| 11 | 7  | 0 | 1.033762  | -1.470188 | -1.302886 |
| 12 | 1  | 0 | -0.441347 | -0.227724 | 2.615531  |
| 13 | 1  | 0 | -2.289364 | -1.598496 | 1.670836  |
| 14 | 1  | 0 | -2.722842 | 0.092241  | 1.651768  |
| 15 | 1  | 0 | -3.238038 | -0.978039 | -0.544446 |
| 16 | 1  | 0 | -1.152110 | 0.545476  | -1.764225 |
| 17 | 1  | 0 | -2.771388 | 1.083672  | -1.437492 |
| 18 | 1  | 0 | -2.151201 | 2.019564  | 0.685979  |
| 19 | 1  | 0 | 0.694682  | 1.043835  | 0.326806  |
| 20 | 1  | 0 | 0.011583  | 1.833914  | 1.714357  |
| 21 | 1  | 0 | 1.395671  | -1.156845 | 1.198085  |
| 22 | 1  | 0 | 0.099613  | -2.314391 | 1.533059  |
| 23 | 1  | 0 | -1.639410 | 3.415432  | -1.292928 |
| 24 | 1  | 0 | -0.490345 | 3.725022  | 0.006025  |
| 25 | 1  | 0 | -1.392960 | -1.909362 | -1.946725 |
| 26 | 1  | 0 | -1.641214 | -2.782800 | -0.427529 |
| 27 | 1  | 0 | 1.983282  | -1.255904 | -1.022529 |
| 28 | 1  | 0 | 0.858199  | -1.574881 | -2.294186 |
| 29 | 1  | 0 | -0.015700 | 2.732351  | -1.372364 |
| 30 | 18 | 0 | 3.758835  | 0.390592  | 0.056444  |

Sum of electronic and zero-point Energies= -973.916600  
Sum of electronic and thermal Energies= -973.904127  
Sum of electronic and thermal Enthalpies= -973.903182  
Sum of electronic and thermal Free Energies= -973.957628

**AmaH<sup>+</sup>(IV)-Ar(I)**

|    |    |   |           |           |           |
|----|----|---|-----------|-----------|-----------|
| 1  | 6  | 0 | 2.454299  | -0.247942 | 1.398047  |
| 2  | 1  | 0 | 2.326827  | 0.068957  | 2.435535  |
| 3  | 1  | 0 | 3.439684  | -0.715334 | 1.348217  |
| 4  | 6  | 0 | 2.526525  | 0.981163  | 0.474523  |
| 5  | 1  | 0 | 3.420379  | 1.542302  | 0.747822  |
| 6  | 6  | 0 | 1.392016  | -1.316016 | 1.043313  |
| 7  | 1  | 0 | 1.778236  | -2.259544 | 1.432696  |
| 8  | 6  | 0 | 0.050141  | -1.121521 | 1.763054  |
| 9  | 1  | 0 | 0.198790  | -1.077265 | 2.842384  |
| 10 | 1  | 0 | -0.485398 | -0.217915 | 1.479550  |
| 11 | 6  | 0 | 1.351743  | 1.974770  | 0.621639  |
| 12 | 1  | 0 | 1.639640  | 2.909818  | 0.121372  |
| 13 | 1  | 0 | 1.151336  | 2.231398  | 1.663759  |
| 14 | 6  | 0 | 0.097573  | 1.560466  | -0.059436 |
| 15 | 6  | 0 | 0.142546  | 0.701425  | -1.271130 |
| 16 | 1  | 0 | -0.804374 | 0.174470  | -1.398407 |
| 17 | 1  | 0 | 0.216195  | 1.412864  | -2.105568 |
| 18 | 6  | 0 | 2.626476  | 0.537942  | -0.987431 |
| 19 | 1  | 0 | 3.502537  | -0.097148 | -1.119248 |
| 20 | 1  | 0 | 2.756824  | 1.398341  | -1.648871 |
| 21 | 6  | 0 | 1.255294  | -1.513595 | -0.484985 |
| 22 | 1  | 0 | 2.060252  | -2.170910 | -0.819664 |
| 23 | 1  | 0 | 0.326102  | -2.042969 | -0.707272 |
| 24 | 6  | 0 | 1.362319  | -0.244762 | -1.351164 |
| 25 | 1  | 0 | 1.417163  | -0.564416 | -2.391979 |
| 26 | 7  | 0 | -1.041600 | 2.006554  | 0.367132  |
| 27 | 1  | 0 | -1.912575 | 1.742326  | -0.076282 |
| 28 | 1  | 0 | -1.104049 | 2.609259  | 1.177713  |
| 29 | 1  | 0 | -0.616584 | -1.959000 | 1.555711  |
| 30 | 18 | 0 | -3.394136 | -0.532126 | -0.164087 |

Sum of electronic and zero-point Energies= -973.915781  
Sum of electronic and thermal Energies= -973.903230  
Sum of electronic and thermal Enthalpies= -973.902285  
Sum of electronic and thermal Free Energies= -973.956552
